# Supplementary material
Source: publisher site journal article supplement (https://www.spandidos-publications.com/7455/downloadSupplementary)
Supplement: Supplementary file 1 [file downloadSupplementary]

## Sheet: Supplementary Table2
Table SII. DELs between cancer and normal.
ID	baseMean	log2FoldChange	lfcSE	stat	pvalue	padj	change
STAG3L5P-PVRIG2P-PILRB	133.319	-8.74622	0.312556	-27.9829	2.62e-172	5.99e-169	DOWN
RGS5	308.723	-6.49423	0.235816	-27.5394	5.93e-167	6.77e-164	DOWN
SLX1A-SULT1A3	37.6101	-9.82111	0.477887	-20.5511	7.52e-94	5.73e-91	DOWN
AC024560.3	49.0127	-6.18195	0.315256	-19.6093	1.29e-85	7.35e-83	DOWN
CDKN2B-AS1	334.074	4.9296	0.269888	18.2654	1.56e-74	7.13e-72	UP
CERS6-AS1	21.4884	-6.617	0.365571	-18.1005	3.16e-73	1.2e-70	DOWN
AC083843.1	19.3307	-8.65938	0.481175	-17.9963	2.08e-72	6.79e-70	DOWN
OGFRP1	371.61	4.20579	0.23393	17.9789	2.85e-72	8.14e-70	UP
AC005562.1	14.9209	-3.67032	0.218937	-16.7643	4.46e-63	1.13e-60	DOWN
SLX1B-SULT1A4	15.5613	-10.1839	0.654035	-15.5709	1.15e-54	2.62e-52	DOWN
LIMD1-AS1	18.9191	-3.7703	0.246027	-15.3248	5.22e-53	1.08e-50	DOWN
PP7080	35.9075	-4.5107	0.296607	-15.2077	3.15e-52	5.98e-50	DOWN
JAZF1-AS1	11.3117	-6.08438	0.402885	-15.102	1.57e-51	2.76e-49	DOWN
LINC00891	8.00763	-6.73052	0.459633	-14.6432	1.49e-48	2.43e-46	DOWN
GUSBP11	185.016	-3.3812	0.231711	-14.5923	3.14e-48	4.78e-46	DOWN
RBM5-AS1	8.64684	-4.7025	0.32622	-14.4151	4.16e-47	5.93e-45	DOWN
AC245100.1	5.77793	-5.56038	0.390523	-14.2383	5.3e-46	7.12e-44	DOWN
PTOV1-AS1	50.1258	-3.47883	0.248987	-13.9719	2.31e-44	2.93e-42	DOWN
AC007620.3	8.21131	-4.9198	0.354095	-13.894	6.89e-44	8.27e-42	DOWN
ACTA2-AS1	110.48	-6.32365	0.455549	-13.8814	8.22e-44	9.38e-42	DOWN
AC058791.1	7.44434	-5.43967	0.391982	-13.8773	8.69e-44	9.45e-42	DOWN
AC093642.1	14.2945	-9.55439	0.688938	-13.8683	9.86e-44	1.02e-41	DOWN
ADAMTS9-AS2	27.3846	-5.69388	0.418876	-13.5932	4.39e-42	4.36e-40	DOWN
LINC01001	61.5377	-5.56507	0.409551	-13.5882	4.7e-42	4.47e-40	DOWN
AC069213.1	15.449	-4.77817	0.352957	-13.5375	9.39e-42	8.57e-40	DOWN
PCOLCE-AS1	7.26982	-4.13323	0.30576	-13.5179	1.23e-41	1.08e-39	DOWN
MIR497HG	16.3251	-6.3653	0.471666	-13.4953	1.67e-41	1.41e-39	DOWN
HCG25	33.2167	-2.58935	0.193548	-13.3784	8.09e-41	6.6e-39	DOWN
AGAP11	31.8963	-8.0248	0.600849	-13.3558	1.1e-40	8.63e-39	DOWN
FAM215B	8.96616	-4.62919	0.34701	-13.3402	1.35e-40	1.03e-38	DOWN
AF131215.2	5.11889	-6.80379	0.513803	-13.242	5.02e-40	3.7e-38	DOWN
CTC-338M12.4	60.1024	-3.08858	0.233401	-13.2329	5.66e-40	4.04e-38	DOWN
AC016747.3	10.0277	-3.90671	0.296097	-13.194	9.5e-40	6.57e-38	DOWN
AC006449.2	15.9096	-3.72804	0.284566	-13.1008	3.26e-39	2.19e-37	DOWN
AC021078.1	712.333	4.18773	0.323922	12.9282	3.12e-38	2.04e-36	UP
AC091057.1	613.361	3.6987	0.295145	12.5318	5e-36	3.17e-34	UP
TMPO-AS1	410.186	2.89661	0.231969	12.487	8.79e-36	5.42e-34	UP
TPT1-AS1	338.067	-2.28587	0.183195	-12.4778	9.86e-36	5.93e-34	DOWN
AL133243.1	5.0371	-5.23905	0.42082	-12.4496	1.41e-35	8.23e-34	DOWN
AC022098.1	81.8662	3.19288	0.259329	12.3121	7.8e-35	4.45e-33	UP
RRN3P2	17.5465	-4.98024	0.407399	-12.2245	2.3e-34	1.28e-32	DOWN
UBR5-AS1	33.7297	-3.21931	0.264991	-12.1487	5.83e-34	3.17e-32	DOWN
AC010642.2	100.489	2.71236	0.227443	11.9255	8.72e-33	4.63e-31	UP
AC107068.1	149.318	3.16911	0.268571	11.7999	3.91e-32	2.03e-30	UP
RALY-AS1	206.515	2.6701	0.227035	11.7607	6.22e-32	3.15e-30	UP
HID1-AS1	2.75388	-4.04405	0.344831	-11.7276	9.2e-32	4.57e-30	DOWN
BMS1P4	13.8537	-2.54243	0.217211	-11.7049	1.2e-31	5.77e-30	DOWN
JPX	94.2509	-2.72346	0.23269	-11.7043	1.21e-31	5.77e-30	DOWN
AL161891.1	98.8983	3.68613	0.315612	11.6793	1.63e-31	7.58e-30	UP
AC009237.14	72.7768	3.86171	0.330993	11.667	1.88e-31	8.58e-30	UP
AL021807.1	146.163	5.83518	0.504746	11.5606	6.52e-31	2.92e-29	UP
A2M-AS1	31.0599	-2.8092	0.243511	-11.5363	8.66e-31	3.8e-29	DOWN
ABALON	1.72584	-5.59396	0.486731	-11.4929	1.43e-30	6.17e-29	DOWN
LINC00893	51.9428	-3.35087	0.291712	-11.4869	1.54e-30	6.49e-29	DOWN
MIR133A1HG	3.24571	-3.74974	0.329355	-11.3851	4.96e-30	2.06e-28	DOWN
LINC00511	2090.84	3.32257	0.295058	11.2607	2.05e-29	8.36e-28	UP
AL132780.1	62.5336	3.01889	0.268354	11.2497	2.32e-29	9.31e-28	UP
AC092944.1	152.765	3.23146	0.287915	11.2236	3.12e-29	1.23e-27	UP
AL513327.1	130.199	3.37293	0.301078	11.2028	3.95e-29	1.53e-27	UP
MYCBP2-AS1	1.99931	-4.31432	0.388593	-11.1024	1.22e-28	4.65e-27	DOWN
AC110611.1	38.0677	3.58266	0.324773	11.0313	2.7e-28	1.01e-26	UP
LINC00115	48.2741	-2.30423	0.20896	-11.0271	2.83e-28	1.04e-26	DOWN
AL118506.1	280.561	3.13922	0.287285	10.9272	8.55e-28	3.09e-26	UP
SH3BP5-AS1	330.024	-2.7402	0.250798	-10.9259	8.67e-28	3.09e-26	DOWN
CRNDE	1616.23	3.10665	0.286055	10.8603	1.78e-27	6.26e-26	UP
AC003681.1	100.255	3.15631	0.292501	10.7908	3.81e-27	1.32e-25	UP
AC093157.1	199.711	3.01506	0.280081	10.7649	5.04e-27	1.72e-25	UP
MAGI2-AS3	219.514	-3.82289	0.355169	-10.7636	5.11e-27	1.72e-25	DOWN
CPEB1-AS1	4.10232	-4.80739	0.448923	-10.7087	9.26e-27	3.07e-25	DOWN
AC145343.1	45.0806	4.94025	0.461646	10.7014	1e-26	3.27e-25	UP
AC016727.1	53.8608	2.86383	0.268753	10.656	1.63e-26	5.26e-25	UP
AC022210.1	67.4064	3.42446	0.321876	10.6391	1.96e-26	6.22e-25	UP
AL355388.1	37.0442	3.53786	0.33263	10.636	2.03e-26	6.34e-25	UP
LINC01197	25.8924	-3.52543	0.331709	-10.6281	2.21e-26	6.81e-25	DOWN
AC004816.1	260.476	3.9498	0.371989	10.6181	2.46e-26	7.48e-25	UP
FEZF1-AS1	249.514	6.63738	0.628603	10.5589	4.62e-26	1.39e-24	UP
LINC00989	10.2567	-4.89717	0.464746	-10.5373	5.81e-26	1.72e-24	DOWN
HOXC13-AS	140.788	6.30923	0.606849	10.3967	2.57e-25	7.51e-24	UP
SEMA3F-AS1	43.0685	-2.16616	0.2087	-10.3793	3.08e-25	8.9e-24	DOWN
HAGLROS	193.681	4.00854	0.387184	10.3531	4.05e-25	1.16e-23	UP
LINC00924	11.5678	-4.62298	0.446919	-10.3441	4.45e-25	1.25e-23	DOWN
AC023593.1	24.2997	6.71206	0.650745	10.3144	6.06e-25	1.69e-23	UP
AC019205.1	251.544	2.9719	0.2882	10.3119	6.22e-25	1.71e-23	UP
AC018690.1	32.3761	3.19738	0.310242	10.3061	6.62e-25	1.8e-23	UP
AC092171.4	21.5892	-2.56676	0.249614	-10.2829	8.42e-25	2.26e-23	DOWN
LINC00339	44.2224	-3.0581	0.29864	-10.2401	1.31e-24	3.48e-23	DOWN
AC009065.4	51.7569	3.32585	0.327582	10.1527	3.22e-24	8.46e-23	UP
CADM3-AS1	49.4298	-6.46626	0.639734	-10.1077	5.1e-24	1.32e-22	DOWN
AP002381.2	52.8894	2.95461	0.293262	10.075	7.13e-24	1.83e-22	UP
LINC01305	348.338	6.41579	0.642302	9.98875	1.71e-23	4.33e-22	UP
AC112220.2	326.173	3.00233	0.302343	9.93021	3.08e-23	7.72e-22	UP
AC074286.1	25.732	-2.79208	0.282307	-9.89024	4.59e-23	1.14e-21	DOWN
AP000787.1	56.7857	2.96539	0.300277	9.8755	5.32e-23	1.31e-21	UP
AC007292.3	2.55882	-3.96778	0.401932	-9.87178	5.52e-23	1.34e-21	DOWN
LINC00958	1363.4	4.08668	0.414547	9.85817	6.32e-23	1.52e-21	UP
MORF4L2-AS1	21.0612	-2.35589	0.242813	-9.70249	2.94e-22	6.96e-21	DOWN
AC083843.2	197.838	2.94919	0.30398	9.70193	2.96e-22	6.96e-21	UP
USP3-AS1	27.6082	-2.26751	0.234195	-9.68215	3.59e-22	8.37e-21	DOWN
ARHGEF7-AS2	1.35154	-6.00906	0.624048	-9.62915	6.02e-22	1.39e-20	DOWN
AP006222.2	5.77565	-7.50473	0.782969	-9.58497	9.25e-22	2.11e-20	DOWN
AC007098.1	40.5388	3.57867	0.373893	9.57136	1.06e-21	2.38e-20	UP
LINC-PINT	176.074	-2.96471	0.309829	-9.56886	1.08e-21	2.42e-20	DOWN
NRAV	720.053	1.57184	0.164293	9.56726	1.1e-21	2.43e-20	UP
LINC00337	41.9005	4.23172	0.442789	9.55696	1.21e-21	2.66e-20	UP
AC079922.2	101.164	2.61635	0.274294	9.53849	1.45e-21	3.15e-20	UP
MRGPRF-AS1	6.13312	-5.25094	0.550566	-9.53735	1.47e-21	3.16e-20	DOWN
N4BP2L2-IT2	122.349	-2.05347	0.216026	-9.50565	1.99e-21	4.2e-20	DOWN
HULC	150.47	3.20408	0.337072	9.50563	1.99e-21	4.2e-20	UP
LINC01151	24.3963	6.95718	0.732214	9.50156	2.07e-21	4.33e-20	UP
AC093788.1	47.263	3.14632	0.331777	9.48324	2.47e-21	5.12e-20	UP
MEF2C-AS1	9.91589	-3.38482	0.357551	-9.46668	2.89e-21	5.94e-20	DOWN
FAM87B	6.63704	-2.46326	0.260598	-9.45234	3.31e-21	6.75e-20	DOWN
AC024896.1	42.2179	4.63356	0.490601	9.44467	3.57e-21	7.2e-20	UP
MEG3	790.002	-4.53748	0.482445	-9.40518	5.19e-21	1.04e-19	DOWN
SNHG21	30.6134	-2.27302	0.241891	-9.39689	5.62e-21	1.12e-19	DOWN
SNHG22	13.1297	-2.55718	0.273701	-9.34298	9.37e-21	1.84e-19	DOWN
HAND2-AS1	160.06	-5.18	0.558087	-9.2817	1.67e-20	3.25e-19	DOWN
AC078816.1	17.2028	6.45334	0.698993	9.23234	2.65e-20	5.12e-19	UP
AL136040.1	26.785	3.2806	0.35657	9.20046	3.56e-20	6.84e-19	UP
LINC00304	5.05782	-4.92318	0.535534	-9.19303	3.82e-20	7.27e-19	DOWN
HEIH	297.567	-1.95712	0.215025	-9.10182	8.88e-20	1.68e-18	DOWN
AL645728.1	29.4235	2.83629	0.311748	9.09803	9.2e-20	1.72e-18	UP
AC009831.1	26.799	3.07238	0.338138	9.08615	1.03e-19	1.9e-18	UP
CYP4A22-AS1	18.0402	6.28023	0.691703	9.07937	1.09e-19	2e-18	UP
SATB2-AS1	72.0367	3.5637	0.392513	9.07917	1.09e-19	2e-18	UP
CA3-AS1	71.5443	3.8542	0.426805	9.03036	1.71e-19	3.1e-18	UP
AC006460.2	62.2512	3.38405	0.375324	9.01635	1.94e-19	3.5e-18	UP
AGAP2-AS1	97.5308	-2.49741	0.277104	-9.01251	2.01e-19	3.59e-18	DOWN
AC099778.1	40.5065	2.3823	0.265106	8.98622	2.56e-19	4.53e-18	UP
DSG2-AS1	25.5486	4.16435	0.463629	8.98207	2.66e-19	4.67e-18	UP
LINC00847	170.491	-1.55121	0.172902	-8.9716	2.92e-19	5.09e-18	DOWN
MATN1-AS1	71.4502	-2.10735	0.235332	-8.9548	3.4e-19	5.89e-18	DOWN
GTF3C2-AS1	6.1753	-2.42447	0.271465	-8.93106	4.22e-19	7.24e-18	DOWN
AC016866.1	16.9477	6.19164	0.693414	8.92921	4.29e-19	7.31e-18	UP
TRAF3IP2-AS1	84.3884	-1.6683	0.187214	-8.9112	5.05e-19	8.54e-18	DOWN
AC079807.1	25.8721	2.66921	0.299622	8.90858	5.17e-19	8.68e-18	UP
LINC01002	109.671	-3.05562	0.343542	-8.89446	5.87e-19	9.78e-18	DOWN
PRMT5-AS1	6.39101	-2.15792	0.243696	-8.85499	8.37e-19	1.38e-17	DOWN
AP002490.1	22.9441	3.46739	0.392616	8.83151	1.03e-18	1.7e-17	UP
AC079610.1	39.391	3.46138	0.392018	8.82967	1.05e-18	1.71e-17	UP
ST7-AS1	30.0157	-2.44686	0.277156	-8.82844	1.06e-18	1.72e-17	DOWN
ZNF582-AS1	17.3406	-3.8226	0.433711	-8.8137	1.21e-18	1.95e-17	DOWN
KCNMA1-AS1	2.51906	-4.8339	0.549153	-8.80246	1.34e-18	2.14e-17	DOWN
DLEU2	344.255	2.16367	0.246005	8.79521	1.43e-18	2.26e-17	UP
AC019080.1	141.272	3.64492	0.415138	8.78001	1.63e-18	2.57e-17	UP
LINC01140	24.6701	-3.47136	0.396195	-8.76174	1.92e-18	3.01e-17	DOWN
AC092117.1	43.8233	2.84539	0.324935	8.7568	2.01e-18	3.12e-17	UP
TMEM72-AS1	7.83882	-2.58523	0.296328	-8.72423	2.68e-18	4.13e-17	DOWN
NAMA	1.35825	-4.35198	0.500116	-8.70194	3.26e-18	5e-17	DOWN
AC034236.2	54.3874	2.31416	0.266053	8.69812	3.37e-18	5.14e-17	UP
AC135050.1	16.8078	3.67673	0.422831	8.6955	3.45e-18	5.22e-17	UP
AC090945.1	4.00759	-3.41726	0.393355	-8.68746	3.71e-18	5.57e-17	DOWN
AC073052.1	1.58078	-4.86361	0.560121	-8.68313	3.85e-18	5.75e-17	DOWN
LINC01176	260.939	2.38146	0.27442	8.67815	4.02e-18	5.96e-17	UP
AC064836.3	44.4447	2.37596	0.27514	8.63546	5.85e-18	8.61e-17	UP
LINC01135	152.552	2.70598	0.313507	8.63132	6.06e-18	8.88e-17	UP
AC019171.1	52.2172	5.6737	0.659018	8.60932	7.35e-18	1.07e-16	UP
AC016737.1	19.9856	4.36735	0.509299	8.57522	9.89e-18	1.43e-16	UP
LINC00844	3.85025	-5.23565	0.612441	-8.54882	1.24e-17	1.79e-16	DOWN
ELFN1-AS1	113.472	6.54509	0.767052	8.53278	1.43e-17	2.04e-16	UP
AC009121.2	22.2398	5.86179	0.688945	8.50836	1.76e-17	2.5e-16	UP
AC027307.2	185.551	2.58699	0.305118	8.47864	2.28e-17	3.21e-16	UP
NEXN-AS1	4.57758	-2.6415	0.312218	-8.46044	2.66e-17	3.73e-16	DOWN
SAP30L-AS1	80.0484	1.63144	0.193049	8.45092	2.89e-17	4.02e-16	UP
LINC01547	183.815	1.92659	0.228219	8.44185	3.12e-17	4.32e-16	UP
AC020915.2	148.461	2.59831	0.309299	8.40064	4.44e-17	6.11e-16	UP
AL391095.1	40.8038	4.01778	0.479103	8.38606	5.03e-17	6.87e-16	UP
SLFN12L	2.12285	-5.2157	0.627037	-8.31801	8.94e-17	1.22e-15	DOWN
LUCAT1	190.015	4.27646	0.515298	8.299	1.05e-16	1.42e-15	UP
AC104532.2	28.7977	2.99994	0.36163	8.29561	1.08e-16	1.45e-15	UP
AP000432.1	3.10286	-7.94686	0.960048	-8.27757	1.26e-16	1.68e-15	DOWN
PITPNA-AS1	28.3204	-2.09039	0.25316	-8.25716	1.49e-16	1.98e-15	DOWN
AC007952.6	1.36085	-4.32008	0.524282	-8.24	1.72e-16	2.27e-15	DOWN
FIRRE	258.438	3.98618	0.484214	8.23229	1.84e-16	2.41e-15	UP
AC008906.1	33.7111	3.34027	0.40585	8.2303	1.87e-16	2.44e-15	UP
KCNMB2-AS1	144.627	6.09789	0.741953	8.2187	2.06e-16	2.67e-15	UP
LINC00467	519.517	2.20341	0.268237	8.21442	2.13e-16	2.75e-15	UP
AL512791.1	22.1763	4.68108	0.570535	8.20472	2.31e-16	2.96e-15	UP
AL139288.1	47.6547	4.61644	0.562942	8.20057	2.39e-16	3.05e-15	UP
RASSF1-AS1	1.23997	-6.49426	0.792287	-8.19686	2.47e-16	3.13e-15	DOWN
AC078785.1	30.2774	2.95026	0.360158	8.19158	2.58e-16	3.25e-15	UP
GSN-AS1	16.1281	-2.02185	0.247245	-8.17749	2.9e-16	3.64e-15	DOWN
LINC00592	44.932	4.0666	0.498285	8.1612	3.32e-16	4.14e-15	UP
CYP4F26P	178.346	4.6761	0.573247	8.15721	3.43e-16	4.25e-15	UP
DPP9-AS1	10.9459	-1.97743	0.242735	-8.14646	3.75e-16	4.62e-15	DOWN
AC114730.2	2.18763	-3.38415	0.415939	-8.13616	4.08e-16	5.01e-15	DOWN
LINC00885	259.585	3.83162	0.471198	8.13166	4.23e-16	5.17e-15	UP
DGCR5	124.604	3.35924	0.413168	8.13043	4.28e-16	5.19e-15	UP
DTX2P1-UPK3BP1-PMS2P11	33.7949	-2.98344	0.367772	-8.11221	4.97e-16	6e-15	DOWN
AL928654.1	62.8287	3.3242	0.410118	8.10548	5.25e-16	6.31e-15	UP
MNX1-AS1	34.7715	6.74689	0.833572	8.09395	5.78e-16	6.9e-15	UP
FTX	1518.35	1.81	0.223987	8.08081	6.43e-16	7.65e-15	UP
LINC01232	278.384	2.55866	0.316691	8.07937	6.51e-16	7.7e-15	UP
LINC00906	1.71641	-5.7339	0.71016	-8.0741	6.8e-16	8e-15	DOWN
AC010976.2	10.0884	-3.32179	0.412023	-8.06214	7.5e-16	8.78e-15	DOWN
LINC01266	2.24667	-4.07536	0.506087	-8.05268	8.1e-16	9.43e-15	DOWN
AP001471.1	1.61476	-4.14059	0.514305	-8.05085	8.22e-16	9.53e-15	DOWN
LINC01133	1793.86	3.98434	0.496355	8.0272	9.97e-16	1.15e-14	UP
AL445531.1	13.1202	6.0619	0.755347	8.02532	1.01e-15	1.16e-14	UP
AC079781.5	30.0556	3.18107	0.396785	8.01713	1.08e-15	1.24e-14	UP
C6orf99	30.4511	3.03704	0.380531	7.98106	1.45e-15	1.65e-14	UP
ZNF436-AS1	125.352	-1.44239	0.18075	-7.98001	1.46e-15	1.65e-14	DOWN
AC110615.1	2.25462	-7.11519	0.893201	-7.96595	1.64e-15	1.84e-14	DOWN
AC004069.1	20.0171	3.33422	0.418754	7.96223	1.69e-15	1.89e-14	UP
AC011450.1	22.3954	3.44675	0.433081	7.95868	1.74e-15	1.94e-14	UP
AP001042.1	99.7946	4.28446	0.539348	7.94377	1.96e-15	2.17e-14	UP
CTD-3080P12.3	1.95324	-4.90528	0.618109	-7.93594	2.09e-15	2.3e-14	DOWN
AL162586.1	85.6459	2.58706	0.326059	7.93433	2.12e-15	2.32e-14	UP
AC253572.1	4.37069	-4.49116	0.566719	-7.92485	2.28e-15	2.5e-14	DOWN
AC108479.1	23.2041	5.68108	0.718346	7.90855	2.6e-15	2.83e-14	UP
SOCS2-AS1	128.965	-3.28783	0.416155	-7.90049	2.78e-15	3.01e-14	DOWN
MBNL1-AS1	252.938	-2.6407	0.335298	-7.87568	3.39e-15	3.65e-14	DOWN
LINC00899	215.679	-1.7038	0.216395	-7.87356	3.45e-15	3.68e-14	DOWN
AC090559.1	95.975	2.9099	0.369585	7.87343	3.45e-15	3.68e-14	UP
LINC01503	1594.26	2.35836	0.299559	7.87277	3.47e-15	3.68e-14	UP
AC012306.2	51.572	2.12823	0.270497	7.86786	3.61e-15	3.8e-14	UP
TEX41	21.0136	-2.7622	0.351087	-7.86757	3.62e-15	3.8e-14	DOWN
ADAMTS9-AS1	34.2842	-4.85375	0.617278	-7.86315	3.75e-15	3.92e-14	DOWN
SNHG4	396.753	2.13132	0.271067	7.86273	3.76e-15	3.92e-14	UP
A1BG-AS1	40.9508	-2.91558	0.372324	-7.83077	4.85e-15	5.03e-14	DOWN
ZSWIM8-AS1	6.5071	-9.19691	1.17588	-7.82128	5.23e-15	5.4e-14	DOWN
ZEB2-AS1	2.40685	-3.74564	0.479681	-7.80861	5.78e-15	5.95e-14	DOWN
DKFZP434A062	2.64861	-3.99153	0.513664	-7.7707	7.81e-15	7.99e-14	DOWN
AF131215.6	134.19	3.12773	0.403498	7.75152	9.08e-15	9.25e-14	UP
MEG9	10.0988	-4.81373	0.621768	-7.742	9.79e-15	9.93e-14	DOWN
AC108925.1	59.1552	4.70207	0.608386	7.72876	1.09e-14	1.1e-13	UP
NCAM1-AS1	3.60742	-4.22992	0.547541	-7.7253	1.12e-14	1.12e-13	DOWN
SLFNL1-AS1	42.7258	-1.81414	0.235409	-7.70636	1.29e-14	1.3e-13	DOWN
AC073046.1	21.6606	3.95272	0.51369	7.69475	1.42e-14	1.41e-13	UP
FAM27E3	20.7956	-2.50717	0.32586	-7.694	1.43e-14	1.42e-13	DOWN
AL133230.1	16.6654	5.44357	0.707854	7.69024	1.47e-14	1.45e-13	UP
SCARNA9	1.99536	-3.30395	0.42987	-7.68594	1.52e-14	1.49e-13	DOWN
AC004943.1	15.0177	3.43482	0.4473	7.67901	1.6e-14	1.57e-13	UP
DIO3OS	406.997	-4.11246	0.536066	-7.67155	1.7e-14	1.66e-13	DOWN
AC007773.1	23.682	3.41086	0.444725	7.66958	1.73e-14	1.68e-13	UP
AC017083.1	15.0558	4.82774	0.629598	7.66798	1.75e-14	1.69e-13	UP
PCAT7	89.9065	4.2505	0.55441	7.6667	1.76e-14	1.7e-13	UP
PITRM1-AS1	29.0023	-1.80213	0.235175	-7.66293	1.82e-14	1.74e-13	DOWN
AC093390.1	5.90694	-6.11031	0.797885	-7.65813	1.89e-14	1.8e-13	DOWN
SPAG5-AS1	28.6222	-1.9368	0.253055	-7.65366	1.95e-14	1.86e-13	DOWN
AP001107.1	13.8149	3.21396	0.420114	7.6502	2.01e-14	1.9e-13	UP
AC010092.1	8.38592	5.41698	0.708751	7.64299	2.12e-14	2e-13	UP
OR2A1-AS1	35.0735	-2.76766	0.363805	-7.60754	2.79e-14	2.62e-13	DOWN
LINC01016	15.5641	-6.19534	0.814433	-7.60693	2.81e-14	2.62e-13	DOWN
LINC01389	38.913	3.74429	0.492241	7.60663	2.81e-14	2.62e-13	UP
LCMT1-AS2	4.94286	-2.42967	0.319691	-7.60005	2.96e-14	2.75e-13	DOWN
AC253576.2	21.0937	3.69968	0.487186	7.59397	3.1e-14	2.86e-13	UP
LINC00506	9.34714	-3.35747	0.442147	-7.59357	3.11e-14	2.86e-13	DOWN
UBL7-AS1	160.154	1.28841	0.169722	7.59129	3.17e-14	2.9e-13	UP
SEMA6A-AS1	16.6492	-2.27341	0.30005	-7.57679	3.54e-14	3.23e-13	DOWN
PVT1	759.404	1.69415	0.223891	7.56687	3.82e-14	3.48e-13	UP
AC105339.2	10.872	4.8278	0.638096	7.56595	3.85e-14	3.49e-13	UP
EMX2OS	414.598	-4.51678	0.597132	-7.56414	3.9e-14	3.52e-13	DOWN
HCP5	5228.34	2.66308	0.352382	7.55736	4.11e-14	3.7e-13	UP
AC093110.1	22.3344	3.86646	0.513124	7.53513	4.88e-14	4.37e-13	UP
AL121761.1	92.1678	5.24821	0.700318	7.49404	6.68e-14	5.96e-13	UP
AP000350.5	6.55845	-4.61559	0.616414	-7.4878	7e-14	6.22e-13	DOWN
AC007881.4	22.4067	4.23167	0.565334	7.48525	7.14e-14	6.32e-13	UP
HOXA11-AS	98.8198	-3.38537	0.452767	-7.47707	7.6e-14	6.7e-13	DOWN
DGUOK-AS1	138.075	1.98584	0.266307	7.45696	8.85e-14	7.77e-13	UP
AC092287.1	14.5961	3.22432	0.433418	7.43928	1.01e-13	8.86e-13	UP
LINC01588	222.661	2.17644	0.293564	7.41385	1.23e-13	1.07e-12	UP
ST7-OT4	1.16973	-3.75828	0.506976	-7.41314	1.23e-13	1.07e-12	DOWN
CASC19	73.0263	5.57442	0.752864	7.40429	1.32e-13	1.14e-12	UP
GATA6-AS1	14.189	-3.06401	0.414733	-7.38791	1.49e-13	1.28e-12	DOWN
AC079907.1	12.0221	4.09591	0.554518	7.38643	1.51e-13	1.29e-12	UP
AC116407.1	17.5298	3.75645	0.50867	7.38485	1.53e-13	1.31e-12	UP
RTCA-AS1	122.796	2.01238	0.272735	7.3785	1.6e-13	1.36e-12	UP
PLBD1-AS1	147.312	2.59083	0.35133	7.37436	1.65e-13	1.4e-12	UP
MIR31HG	325.013	3.78596	0.513943	7.36649	1.75e-13	1.48e-12	UP
ARAP1-AS2	6.79015	-2.38081	0.324238	-7.34278	2.09e-13	1.76e-12	DOWN
CASC9	311.433	7.24182	0.987201	7.3357	2.21e-13	1.85e-12	UP
FLJ46284	16.3843	-2.26617	0.309445	-7.32335	2.42e-13	2.02e-12	DOWN
AC009303.2	2.6311	-3.31168	0.452782	-7.31407	2.59e-13	2.16e-12	DOWN
HOXC-AS2	42.3833	2.91761	0.399038	7.3116	2.64e-13	2.19e-12	UP
AL136221.1	6.34615	5.01667	0.686425	7.30839	2.7e-13	2.23e-12	UP
EPB41L4A-AS1	729.606	-1.49636	0.204751	-7.30818	2.71e-13	2.23e-12	DOWN
AC092687.3	30.9809	3.08983	0.423104	7.30277	2.82e-13	2.31e-12	UP
AL133243.3	34.1726	2.18894	0.29976	7.30231	2.83e-13	2.31e-12	UP
TMEM161B-AS1	540.858	1.75699	0.240846	7.29505	2.99e-13	2.43e-12	UP
TMLHE-AS1	2.82689	-2.59982	0.356584	-7.29091	3.08e-13	2.5e-12	DOWN
AF230666.2	3.94441	-3.00229	0.412112	-7.28513	3.21e-13	2.6e-12	DOWN
AC007384.1	24.4669	3.84149	0.528084	7.27439	3.48e-13	2.81e-12	UP
AC078881.1	20.6256	3.74862	0.516209	7.26182	3.82e-13	3.07e-12	UP
AL117209.1	13.2524	4.87241	0.671777	7.25301	4.08e-13	3.27e-12	UP
AC025171.1	438.404	1.50341	0.207467	7.24649	4.28e-13	3.41e-12	UP
LINC00880	1.51878	-5.24358	0.725931	-7.22325	5.08e-13	4.04e-12	DOWN
AC079834.1	25.8674	3.67125	0.50901	7.21253	5.49e-13	4.35e-12	UP
AC109460.1	11.8522	3.7597	0.521598	7.20805	5.68e-13	4.48e-12	UP
EDRF1-AS1	4.7268	-2.39428	0.333329	-7.18292	6.82e-13	5.37e-12	DOWN
AC009065.2	25.1312	4.39173	0.611559	7.1812	6.91e-13	5.42e-12	UP
BEAN1-AS1	3.15892	-3.06532	0.427557	-7.1694	7.53e-13	5.89e-12	DOWN
AC020915.1	13.241	3.34384	0.466648	7.16566	7.74e-13	6.03e-12	UP
AC016821.1	20.4869	4.00513	0.559644	7.15657	8.27e-13	6.42e-12	UP
FRMD6-AS2	12.9637	-5.67369	0.793821	-7.14733	8.85e-13	6.85e-12	DOWN
AC010331.1	15.3344	3.00801	0.420913	7.1464	8.91e-13	6.87e-12	UP
SSBP3-AS1	38.7368	-2.10347	0.294524	-7.14192	9.2e-13	7.07e-12	DOWN
LINC01572	55.7891	1.78287	0.249777	7.13785	9.48e-13	7.26e-12	UP
BCRP3	3.66576	-4.60966	0.646168	-7.13384	9.76e-13	7.45e-12	DOWN
PTCSC2	23.1078	4.60174	0.648377	7.09733	1.27e-12	9.68e-12	UP
LINC01106	81.0267	-2.19697	0.310205	-7.08231	1.42e-12	1.08e-11	DOWN
CACNA1G-AS1	6.80682	-3.54195	0.500376	-7.07857	1.46e-12	1.1e-11	DOWN
AC025166.1	6.14379	4.72778	0.668164	7.07578	1.49e-12	1.12e-11	UP
CCDC13-AS1	6.22107	-2.63641	0.372612	-7.07547	1.49e-12	1.12e-11	DOWN
AC016747.1	259.088	2.98724	0.422334	7.07316	1.51e-12	1.13e-11	UP
C6orf223	541.076	3.95273	0.560271	7.05502	1.73e-12	1.29e-11	UP
RARA-AS1	81.3199	-1.68431	0.239116	-7.0439	1.87e-12	1.39e-11	DOWN
TMEM44-AS1	289.235	1.56818	0.223244	7.02453	2.15e-12	1.59e-11	UP
AC113404.1	2.65662	-7.72344	1.09999	-7.0214	2.2e-12	1.62e-11	DOWN
TYMSOS	61.916	2.19056	0.312006	7.02089	2.2e-12	1.62e-11	UP
FP671120.7	27.3842	4.42134	0.630539	7.01199	2.35e-12	1.72e-11	UP
LINC00028	1.04639	-3.66167	0.522218	-7.01176	2.35e-12	1.72e-11	DOWN
PCAT1	52.9075	2.2921	0.327811	6.99215	2.71e-12	1.97e-11	UP
KLF3-AS1	114.029	-2.32963	0.333325	-6.98906	2.77e-12	2.01e-11	DOWN
FOXCUT	37.0206	4.30072	0.61594	6.98236	2.9e-12	2.1e-11	UP
AC017074.1	14.5798	3.6935	0.529722	6.97253	3.11e-12	2.25e-11	UP
AL162151.3	12.6727	-4.77714	0.685737	-6.96643	3.25e-12	2.34e-11	DOWN
MIR205HG	11155.2	2.99449	0.4299	6.96556	3.27e-12	2.35e-11	UP
AC097359.2	47.7685	1.74517	0.250996	6.95298	3.58e-12	2.56e-11	UP
AC009950.1	14.8004	-2.90878	0.41878	-6.94584	3.76e-12	2.68e-11	DOWN
AC024361.1	16.7438	2.69569	0.389771	6.91609	4.64e-12	3.3e-11	UP
COL18A1-AS1	1.32035	-3.9244	0.56972	-6.88831	5.65e-12	4e-11	DOWN
PAN3-AS1	49.5763	-1.24214	0.180944	-6.86477	6.66e-12	4.71e-11	DOWN
AC135050.5	16.1537	3.02382	0.440885	6.85854	6.96e-12	4.9e-11	UP
DLEU2L	11.4973	-2.18964	0.31951	-6.85312	7.23e-12	5.08e-11	DOWN
NR2F2-AS1	39.4477	-3.06081	0.447824	-6.83485	8.21e-12	5.75e-11	DOWN
TTN-AS1	108.413	-2.0383	0.298401	-6.83076	8.45e-12	5.9e-11	DOWN
PGM5-AS1	17.4522	-6.35692	0.931569	-6.82389	8.86e-12	6.17e-11	DOWN
LINC00937	21.5972	-2.56483	0.376022	-6.82096	9.04e-12	6.28e-11	DOWN
AL662797.1	10.564	4.08825	0.600377	6.80947	9.8e-12	6.78e-11	UP
LINC00702	67.503	-3.26392	0.479384	-6.80857	9.86e-12	6.8e-11	DOWN
LINC00460	25.1789	5.79922	0.852465	6.80288	1.03e-11	7.05e-11	UP
HOXB-AS4	43.4994	4.32159	0.637424	6.77978	1.2e-11	8.25e-11	UP
AL592211.1	12.5199	2.91608	0.430536	6.77315	1.26e-11	8.61e-11	UP
AL354928.1	5.09682	4.45431	0.658534	6.76398	1.34e-11	9.15e-11	UP
AC091185.1	15.0964	3.76092	0.556295	6.76065	1.37e-11	9.33e-11	UP
KCNIP2-AS1	4.55133	-1.83555	0.271538	-6.75984	1.38e-11	9.36e-11	DOWN
ATP2A1-AS1	44.8285	2.34278	0.346869	6.75408	1.44e-11	9.71e-11	UP
C9orf106	7.32727	-3.38517	0.502173	-6.74106	1.57e-11	1.06e-10	DOWN
NFYC-AS1	39.0236	-1.603	0.2379	-6.73812	1.6e-11	1.08e-10	DOWN
AC007611.1	23.2751	2.84625	0.425219	6.69361	2.18e-11	1.46e-10	UP
LINC01518	10.6963	5.52529	0.825512	6.69317	2.18e-11	1.46e-10	UP
AC009495.3	15.6373	2.18337	0.326581	6.68555	2.3e-11	1.53e-10	UP
TMEM147-AS1	290.917	-1.31772	0.197163	-6.68338	2.33e-11	1.55e-10	DOWN
KLHL30-AS1	4.4897	-3.89497	0.58306	-6.68022	2.39e-11	1.58e-10	DOWN
KIAA1614-AS1	3.70172	-2.63368	0.394904	-6.66916	2.57e-11	1.7e-10	DOWN
KCNQ1OT1	282.285	-2.12558	0.31886	-6.6662	2.63e-11	1.73e-10	DOWN
AC017104.1	26.4899	2.70556	0.40706	6.64659	3e-11	1.97e-10	UP
BAALC-AS1	301.702	2.38554	0.359596	6.63395	3.27e-11	2.14e-10	UP
LINC00491	109.315	6.07995	0.917335	6.62784	3.41e-11	2.22e-10	UP
AP001189.4	4.35931	-8.33362	1.2611	-6.60819	3.89e-11	2.53e-10	DOWN
AL163952.1	9.52084	5.35757	0.812339	6.59523	4.25e-11	2.75e-10	UP
PTOV1-AS2	117.199	-1.41829	0.215114	-6.59323	4.3e-11	2.78e-10	DOWN
AC026367.1	9.68542	3.78893	0.576611	6.57103	5e-11	3.22e-10	UP
MAP3K14-AS1	208.837	1.66299	0.253142	6.56939	5.05e-11	3.25e-10	UP
LINC00520	104.685	4.68981	0.71457	6.56313	5.27e-11	3.38e-10	UP
AC012360.1	4.98293	4.42531	0.675399	6.55214	5.67e-11	3.63e-10	UP
RAET1E-AS1	2.86694	-3.6766	0.561449	-6.54841	5.82e-11	3.71e-10	DOWN
XACT	18.2375	4.14621	0.635038	6.52907	6.62e-11	4.21e-10	UP
AC018816.1	23.3676	2.85357	0.437344	6.52477	6.81e-11	4.32e-10	UP
SAMD12-AS1	17.1673	3.59828	0.552729	6.51003	7.51e-11	4.75e-10	UP
DEPDC1-AS1	10.7218	4.33109	0.665573	6.5073	7.65e-11	4.83e-10	UP
HMGA1P4	15.8934	2.58623	0.397486	6.50646	7.69e-11	4.84e-10	UP
LINC00707	275.523	5.34622	0.82249	6.50003	8.03e-11	5.04e-10	UP
LINC00641	311.897	-1.5305	0.235794	-6.49083	8.54e-11	5.34e-10	DOWN
AC007285.1	3.7974	4.27103	0.658847	6.48257	9.02e-11	5.62e-10	UP
AL121992.1	10.3601	3.56984	0.551058	6.47815	9.29e-11	5.78e-10	UP
SUCLA2-AS1	19.0568	2.34095	0.361641	6.47315	9.6e-11	5.95e-10	UP
FAM66C	38.2749	-2.25299	0.348595	-6.46305	1.03e-10	6.35e-10	DOWN
LINC00853	29.667	2.44175	0.378024	6.45924	1.05e-10	6.49e-10	UP
AC119403.1	21.8381	2.16108	0.334744	6.45592	1.08e-10	6.62e-10	UP
OVCH1-AS1	45.1387	2.15609	0.334003	6.45532	1.08e-10	6.62e-10	UP
APTR	532.104	1.14444	0.177295	6.45504	1.08e-10	6.62e-10	UP
AL590764.1	21.738	3.04163	0.471756	6.44747	1.14e-10	6.94e-10	UP
AL009179.1	89.9497	3.71358	0.577983	6.42506	1.32e-10	8.03e-10	UP
LINC00299	36.2746	2.43685	0.379569	6.42004	1.36e-10	8.27e-10	UP
AC026904.1	1.61512	-4.28703	0.668028	-6.41744	1.39e-10	8.39e-10	DOWN
AC130469.1	1.62962	-3.04501	0.475088	-6.40935	1.46e-10	8.83e-10	DOWN
AL645608.1	11.6289	4.25421	0.664642	6.40076	1.55e-10	9.31e-10	UP
LINC00926	90.7534	-1.79262	0.280254	-6.39642	1.59e-10	9.56e-10	DOWN
AC005863.1	32.1348	6.39255	0.999727	6.39429	1.61e-10	9.66e-10	UP
LINC00670	1.58459	-5.15701	0.806546	-6.39394	1.62e-10	9.66e-10	DOWN
AC124276.1	7.43559	5.2429	0.820679	6.38849	1.68e-10	9.99e-10	UP
FAM13A-AS1	168.443	-1.61473	0.253568	-6.36805	1.91e-10	1.14e-09	DOWN
AC107081.1	6.1536	4.00588	0.630932	6.34915	2.17e-10	1.28e-09	UP
LINC01237	18.2257	-2.27253	0.35846	-6.33972	2.3e-10	1.36e-09	DOWN
LINC01126	14.1924	-1.87873	0.296494	-6.33647	2.35e-10	1.39e-09	DOWN
AC104024.2	15.6889	5.11575	0.809162	6.32229	2.58e-10	1.52e-09	UP
LINC00239	31.0891	2.29529	0.363666	6.31154	2.76e-10	1.62e-09	UP
LINC00393	27.4575	6.40582	1.01514	6.3103	2.78e-10	1.63e-09	UP
LINC01186	48.9688	3.27265	0.519077	6.30476	2.89e-10	1.69e-09	UP
AC022819.1	8.7665	3.645	0.578341	6.30251	2.93e-10	1.7e-09	UP
NRSN2-AS1	233.909	1.48832	0.236153	6.30234	2.93e-10	1.7e-09	UP
AP000962.1	1.42199	-3.91534	0.621376	-6.30109	2.96e-10	1.71e-09	DOWN
BBOX1-AS1	235.991	4.13399	0.657714	6.28539	3.27e-10	1.89e-09	UP
COL4A2-AS1	1.90728	-2.99526	0.478342	-6.26175	3.81e-10	2.19e-09	DOWN
LINC01165	1.76803	-4.27854	0.684819	-6.2477	4.17e-10	2.4e-09	DOWN
NBR2	373.112	1.16843	0.187071	6.24593	4.21e-10	2.42e-09	UP
SNHG17	1998.95	1.35227	0.216749	6.23887	4.41e-10	2.52e-09	UP
WT1-AS	39.271	-4.42407	0.709132	-6.23871	4.41e-10	2.52e-09	DOWN
LINC01010	30.5118	3.6657	0.588123	6.23289	4.58e-10	2.61e-09	UP
AL606500.1	22.8597	5.65991	0.908839	6.22763	4.74e-10	2.69e-09	UP
CLRN1-AS1	2.52448	-4.63285	0.745858	-6.21144	5.25e-10	2.97e-09	DOWN
CEBPB-AS1	54.1161	-1.66026	0.267939	-6.1964	5.78e-10	3.26e-09	DOWN
LINC01281	10.8669	4.82722	0.77982	6.19017	6.01e-10	3.39e-09	UP
AL137800.1	28.2979	7.17148	1.1586	6.18977	6.03e-10	3.39e-09	UP
LINC01089	442.496	-1.40996	0.227938	-6.1857	6.18e-10	3.47e-09	DOWN
LINC01338	11.6662	5.65127	0.914537	6.17938	6.44e-10	3.6e-09	UP
AC007387.2	4.89912	4.63901	0.753153	6.15945	7.3e-10	4.07e-09	UP
AL590723.1	10.1774	3.28972	0.535595	6.14217	8.14e-10	4.52e-09	UP
AC159540.2	3.25338	-2.36294	0.384713	-6.14208	8.14e-10	4.52e-09	DOWN
CASC8	60.4944	3.03903	0.494945	6.14014	8.25e-10	4.57e-09	UP
AC092614.1	10.0291	3.52933	0.57498	6.13818	8.35e-10	4.61e-09	UP
UGDH-AS1	36.2284	-1.36551	0.222979	-6.12395	9.13e-10	5.02e-09	DOWN
LINC01359	17.008	-1.99933	0.326531	-6.12296	9.19e-10	5.04e-09	DOWN
AL139022.1	4.45408	4.01905	0.656795	6.11919	9.41e-10	5.15e-09	UP
CERS3-AS1	72.4518	2.81199	0.45993	6.11397	9.72e-10	5.31e-09	UP
AC114763.1	12.6714	2.38836	0.391314	6.10344	1.04e-09	5.66e-09	UP
BCDIN3D-AS1	28.3606	-1.33568	0.218868	-6.10266	1.04e-09	5.67e-09	DOWN
AL662791.1	10.5726	3.34885	0.549574	6.09354	1.1e-09	5.99e-09	UP
Z99916.1	4.63908	4.32197	0.709418	6.09228	1.11e-09	6.02e-09	UP
AC006557.1	9.82532	3.65331	0.600199	6.08683	1.15e-09	6.22e-09	UP
AC018647.3	3.75283	-2.33368	0.383811	-6.0803	1.2e-09	6.45e-09	DOWN
AC004492.1	17.7303	2.01692	0.331716	6.08025	1.2e-09	6.45e-09	UP
AL391001.1	41.883	2.33464	0.38406	6.07884	1.21e-09	6.48e-09	UP
TSIX	15.9972	-2.31258	0.380445	-6.0786	1.21e-09	6.48e-09	DOWN
AC093690.1	8.93474	-1.42798	0.235103	-6.07383	1.25e-09	6.66e-09	DOWN
C1orf229	8.11431	-2.80696	0.462301	-6.07172	1.27e-09	6.73e-09	DOWN
LINC00942	46.2187	3.22572	0.531524	6.06881	1.29e-09	6.84e-09	UP
OCIAD1-AS1	8.91942	2.49878	0.41205	6.06426	1.33e-09	7.02e-09	UP
ALOX12-AS1	112.673	-1.1256	0.185774	-6.05894	1.37e-09	7.24e-09	DOWN
AP000356.2	13.0566	4.64016	0.766126	6.05666	1.39e-09	7.33e-09	UP
LINC01546	17.1023	3.6322	0.599836	6.05532	1.4e-09	7.37e-09	UP
AL049539.1	9.99236	4.03166	0.666256	6.05121	1.44e-09	7.54e-09	UP
ZBTB11-AS1	226.272	1.22566	0.202687	6.04706	1.48e-09	7.72e-09	UP
C11orf72	2.44199	-2.31647	0.383189	-6.04525	1.49e-09	7.79e-09	DOWN
MCCC1-AS1	18.5747	-1.75672	0.290697	-6.04315	1.51e-09	7.88e-09	DOWN
FOXD3-AS1	200.531	2.76666	0.458251	6.03744	1.57e-09	8.14e-09	UP
AL133410.1	25.387	3.3228	0.550421	6.03684	1.57e-09	8.15e-09	UP
AC008937.3	14.3098	2.27023	0.376805	6.02493	1.69e-09	8.76e-09	UP
LINC00539	57.4398	1.81789	0.301976	6.01998	1.74e-09	9.01e-09	UP
DLG1-AS1	35.1198	2.60655	0.433357	6.01478	1.8e-09	9.28e-09	UP
AL354833.2	6.5404	5.05845	0.841373	6.01213	1.83e-09	9.41e-09	UP
AC109642.1	2.12508	-7.08907	1.18025	-6.00639	1.9e-09	9.73e-09	DOWN
AC011997.1	11.6253	4.2288	0.705947	5.99025	2.1e-09	1.07e-08	UP
AC133785.1	68.5245	3.12919	0.523186	5.98103	2.22e-09	1.13e-08	UP
AC021037.1	7.99468	2.92349	0.488873	5.98006	2.23e-09	1.14e-08	UP
LINC01137	478.429	1.66321	0.278719	5.96734	2.41e-09	1.23e-08	UP
EXTL3-AS1	23.0143	-1.5493	0.259659	-5.96666	2.42e-09	1.23e-08	DOWN
LINC00534	12.2814	5.96702	1.00172	5.95677	2.57e-09	1.3e-08	UP
AC004837.4	4.64447	4.07949	0.685044	5.95507	2.6e-09	1.31e-08	UP
AC091132.2	4.00321	4.10543	0.689824	5.95142	2.66e-09	1.34e-08	UP
AC016727.3	3.57463	3.94071	0.662736	5.94612	2.75e-09	1.38e-08	UP
TTC3-AS1	2.13143	-2.24825	0.378358	-5.94213	2.81e-09	1.41e-08	DOWN
EAF1-AS1	3.8652	-2.09772	0.353425	-5.93541	2.93e-09	1.47e-08	DOWN
AC012181.2	12.3242	2.19883	0.370544	5.93405	2.96e-09	1.48e-08	UP
AC100821.2	3.63875	3.97089	0.669472	5.93138	3e-09	1.5e-08	UP
LINC01524	6.21732	4.98175	0.839943	5.93106	3.01e-09	1.5e-08	UP
LINC01063	17.4162	2.61786	0.441803	5.9254	3.12e-09	1.55e-08	UP
CACTIN-AS1	12.9875	-1.55821	0.262993	-5.92493	3.12e-09	1.55e-08	DOWN
AC092275.1	13.4412	4.48781	0.759122	5.91184	3.38e-09	1.67e-08	UP
AC007405.4	3.35968	-3.55691	0.602184	-5.90668	3.49e-09	1.72e-08	DOWN
BACH1-AS1	8.23658	2.9625	0.502547	5.89498	3.75e-09	1.84e-08	UP
AP4B1-AS1	15.5491	-1.78356	0.303437	-5.87786	4.16e-09	2.04e-08	DOWN
DARS-AS1	76.5722	1.59462	0.271995	5.8627	4.55e-09	2.23e-08	UP
AC092896.1	3.51237	3.9226	0.670019	5.85447	4.79e-09	2.34e-08	UP
GLIDR	28.9881	-1.54834	0.264678	-5.84991	4.92e-09	2.4e-08	DOWN
CACNA1C-AS1	4.42355	-2.47921	0.425252	-5.82997	5.54e-09	2.7e-08	DOWN
PGM5P4-AS1	2.12249	-4.49004	0.771286	-5.8215	5.83e-09	2.83e-08	DOWN
MPRIP-AS1	1.92172	-2.40329	0.413477	-5.8124	6.16e-09	2.99e-08	DOWN
PLA2G4E-AS1	27.9456	3.78233	0.651409	5.80637	6.38e-09	3.08e-08	UP
AC131011.1	10.8466	3.51043	0.604599	5.80621	6.39e-09	3.08e-08	UP
AC012368.1	68.9162	2.1985	0.37941	5.79453	6.85e-09	3.3e-08	UP
U52111.1	14.9764	2.45114	0.42343	5.78878	7.09e-09	3.41e-08	UP
CCDC26	19.795	3.33488	0.576337	5.78634	7.19e-09	3.45e-08	UP
HHLA3	564.503	1.41569	0.244869	5.78142	7.41e-09	3.55e-08	UP
LINC00222	5.24258	-2.3725	0.410666	-5.7772	7.6e-09	3.63e-08	DOWN
AL354833.1	11.8003	1.95351	0.33836	5.77347	7.77e-09	3.7e-08	UP
TMEM220-AS1	10.3005	-2.34596	0.406568	-5.77017	7.92e-09	3.77e-08	DOWN
AC012181.1	8.52244	2.6143	0.453099	5.76983	7.94e-09	3.77e-08	UP
LINC01269	58.0365	3.44569	0.597587	5.76601	8.12e-09	3.84e-08	UP
LINC00921	78.6531	-1.17642	0.204126	-5.76322	8.25e-09	3.9e-08	DOWN
LINC01006	656.733	1.8823	0.326789	5.75999	8.41e-09	3.97e-08	UP
RFPL3S	14.1478	-1.85897	0.323167	-5.75236	8.8e-09	4.14e-08	DOWN
LINC01605	294.529	3.11862	0.542444	5.74919	8.97e-09	4.21e-08	UP
AC010525.1	3.63953	3.72691	0.649216	5.74064	9.43e-09	4.42e-08	UP
MIR17HG	107.824	1.75515	0.30606	5.73465	9.77e-09	4.57e-08	UP
AL139099.2	3.39538	3.87151	0.676896	5.7195	1.07e-08	4.99e-08	UP
AC010754.1	16.936	3.39962	0.595417	5.70965	1.13e-08	5.27e-08	UP
LINC01559	296.547	4.35961	0.763595	5.70933	1.13e-08	5.27e-08	UP
AC027601.1	38.9083	-1.41866	0.249148	-5.69403	1.24e-08	5.76e-08	DOWN
LINC00884	186.441	2.55982	0.449602	5.69352	1.24e-08	5.76e-08	UP
IGFBP7-AS1	3.08773	-2.53822	0.446233	-5.68809	1.28e-08	5.94e-08	DOWN
PTPRD-AS1	10.9273	-3.82118	0.672465	-5.68235	1.33e-08	6.13e-08	DOWN
SFTPD-AS1	5.59214	-3.03945	0.535253	-5.67854	1.36e-08	6.25e-08	DOWN
TEX26-AS1	2.75848	-2.95668	0.520963	-5.67541	1.38e-08	6.36e-08	DOWN
LINC01050	4.90398	4.64097	0.818308	5.67142	1.42e-08	6.49e-08	UP
ZNF649-AS1	4.10181	4.14239	0.730771	5.66851	1.44e-08	6.59e-08	UP
LINC00957	114.652	-1.47836	0.260986	-5.66451	1.47e-08	6.73e-08	DOWN
TUBA3FP	10.3793	-2.41702	0.426759	-5.66366	1.48e-08	6.75e-08	DOWN
AC015971.1	5.45396	3.82746	0.677268	5.65132	1.59e-08	7.24e-08	UP
AL161645.1	11.9091	5.68168	1.00624	5.64647	1.64e-08	7.43e-08	UP
EP300-AS1	29.671	2.0575	0.36476	5.6407	1.69e-08	7.67e-08	UP
MAGI1-IT1	5.91908	-2.24181	0.398129	-5.63086	1.79e-08	8.11e-08	DOWN
ADAMTSL4-AS1	7.91616	-2.23459	0.397118	-5.62702	1.83e-08	8.27e-08	DOWN
AC132192.1	3.18127	3.77402	0.670769	5.6264	1.84e-08	8.29e-08	UP
GHET1	33.4054	1.77053	0.315104	5.61887	1.92e-08	8.64e-08	UP
AC012640.1	3.66932	3.74294	0.668001	5.60319	2.1e-08	9.44e-08	UP
UNC5B-AS1	239.323	2.78129	0.496647	5.60013	2.14e-08	9.59e-08	UP
AC023283.1	3.27733	3.81993	0.682434	5.59751	2.17e-08	9.72e-08	UP
TM4SF1-AS1	30.2166	2.76735	0.495027	5.59029	2.27e-08	1.01e-07	UP
LINC00862	9.9901	4.00188	0.718945	5.56632	2.6e-08	1.16e-07	UP
TCL6	6.84232	-3.08799	0.554859	-5.56536	2.62e-08	1.16e-07	DOWN
LINC01254	9.52168	5.59967	1.00652	5.5634	2.65e-08	1.17e-07	UP
CIRBP-AS1	94.3135	1.48635	0.267372	5.55911	2.71e-08	1.2e-07	UP
AP000350.8	3.94865	3.60672	0.64909	5.55658	2.75e-08	1.21e-07	UP
LINC01285	57.5818	3.97739	0.71863	5.53469	3.12e-08	1.37e-07	UP
SOX2-OT	107.539	2.83426	0.512163	5.53391	3.13e-08	1.38e-07	UP
HAGLR	856.267	2.1866	0.395366	5.53057	3.19e-08	1.4e-07	UP
AC009495.2	1.72923	-2.95547	0.534896	-5.52531	3.29e-08	1.44e-07	DOWN
AC067945.2	2.69798	3.77456	0.683151	5.52522	3.29e-08	1.44e-07	UP
TSC22D1-AS1	28.9683	-1.57664	0.285988	-5.51297	3.53e-08	1.54e-07	DOWN
FAM157C	30.258	-2.3001	0.418122	-5.50104	3.78e-08	1.65e-07	DOWN
AC027811.1	3.10113	3.73756	0.680238	5.49448	3.92e-08	1.7e-07	UP
LINC01290	15.5234	2.11994	0.386353	5.48705	4.09e-08	1.77e-07	UP
AL121987.1	11.8446	3.80024	0.692767	5.4856	4.12e-08	1.79e-07	UP
AC073370.1	4.68869	4.57436	0.833977	5.485	4.13e-08	1.79e-07	UP
RHPN1-AS1	73.3322	1.81231	0.331314	5.47006	4.5e-08	1.94e-07	UP
AL513123.1	9.97027	5.66634	1.0362	5.46837	4.54e-08	1.96e-07	UP
SMCR5	1.87293	-2.38034	0.435594	-5.46459	4.64e-08	1.99e-07	DOWN
AC104841.1	8.48703	3.15407	0.579402	5.44366	5.22e-08	2.24e-07	UP
DLEU1	260.088	1.39888	0.257097	5.44107	5.3e-08	2.27e-07	UP
MIR155HG	107.373	1.90877	0.351024	5.43773	5.4e-08	2.31e-07	UP
LINC00519	134.875	3.00953	0.554146	5.43092	5.61e-08	2.39e-07	UP
STK4-AS1	20.8631	1.73629	0.319765	5.42991	5.64e-08	2.4e-07	UP
OIP5-AS1	7045.72	1.16564	0.214861	5.42509	5.79e-08	2.46e-07	UP
AL590096.1	3.80099	3.55355	0.656786	5.41051	6.28e-08	2.67e-07	UP
OXCT1-AS1	11.3399	-1.95096	0.36114	-5.40224	6.58e-08	2.79e-07	DOWN
AC008982.2	20.2264	2.19443	0.406669	5.39612	6.81e-08	2.87e-07	UP
LINC01391	20.7358	-3.3248	0.616841	-5.39004	7.04e-08	2.97e-07	DOWN
CYP1B1-AS1	28.0111	-2.2333	0.414629	-5.38625	7.19e-08	3.02e-07	DOWN
LINC00612	5.09396	-1.86554	0.346378	-5.38584	7.21e-08	3.03e-07	DOWN
AC123768.1	4.21105	3.45719	0.64355	5.37206	7.78e-08	3.26e-07	UP
AC006452.1	3.93008	4.08071	0.760306	5.36719	8e-08	3.34e-07	UP
TTLL10-AS1	5.63379	-2.31628	0.431843	-5.36371	8.15e-08	3.4e-07	DOWN
RHOXF1-AS1	262.731	4.23271	0.789571	5.36077	8.29e-08	3.45e-07	UP
FAM83A-AS1	400.277	2.98119	0.557774	5.34481	9.05e-08	3.76e-07	UP
ZBED5-AS1	364.148	1.17153	0.219353	5.34082	9.25e-08	3.84e-07	UP
C5orf66-AS1	416.978	2.86286	0.536098	5.34017	9.29e-08	3.85e-07	UP
AC008691.1	7.71583	3.87006	0.724901	5.33873	9.36e-08	3.87e-07	UP
AC012613.2	1.25357	-3.96118	0.742363	-5.3359	9.51e-08	3.92e-07	DOWN
RMDN2-AS1	2.44408	-2.44235	0.459223	-5.31844	1.05e-07	4.31e-07	DOWN
CTBP1-AS	65.7426	-1.53727	0.290384	-5.29392	1.2e-07	4.92e-07	DOWN
AL121895.1	9.30918	2.79922	0.529196	5.28958	1.23e-07	5.03e-07	UP
TTC39C-AS1	14.3078	2.4746	0.468717	5.27953	1.3e-07	5.3e-07	UP
AC131254.1	3.92328	4.31819	0.817924	5.27945	1.3e-07	5.3e-07	UP
AC093484.4	17.7832	1.81877	0.344576	5.27827	1.3e-07	5.33e-07	UP
RBAKDN	1.37399	-2.81845	0.536483	-5.25357	1.49e-07	6.08e-07	DOWN
ADIRF-AS1	437.111	-1.6927	0.322253	-5.25271	1.5e-07	6.1e-07	DOWN
CCND2-AS1	10.55	-2.2391	0.426769	-5.24662	1.55e-07	6.28e-07	DOWN
RAMP2-AS1	101.087	-2.55691	0.487349	-5.24657	1.55e-07	6.28e-07	DOWN
AC010207.1	16.0538	2.42685	0.462668	5.24534	1.56e-07	6.31e-07	UP
CH17-340M24.3	206.145	1.53835	0.293392	5.24334	1.58e-07	6.37e-07	UP
MIR4435-2HG	735.005	1.33355	0.254361	5.24275	1.58e-07	6.38e-07	UP
AP001619.1	3.20856	3.5453	0.676641	5.23956	1.61e-07	6.48e-07	UP
HLA-F-AS1	80.7533	-1.63606	0.312412	-5.23688	1.63e-07	6.56e-07	DOWN
WDFY3-AS2	87.9103	-1.37991	0.263755	-5.2318	1.68e-07	6.74e-07	DOWN
AC011322.1	28.5934	2.00295	0.38398	5.21628	1.83e-07	7.31e-07	UP
C10orf55	58.582	2.03596	0.390966	5.20752	1.91e-07	7.65e-07	UP
UNQ6494	14.2801	-2.52297	0.484735	-5.20484	1.94e-07	7.75e-07	DOWN
LINC01410	125.979	1.35629	0.260829	5.19992	1.99e-07	7.94e-07	UP
FARP1-AS1	1.0319	-3.17199	0.610797	-5.1932	2.07e-07	8.22e-07	DOWN
AC010148.1	16.8167	2.62963	0.506761	5.18911	2.11e-07	8.39e-07	UP
AC017028.2	3.03076	3.69895	0.713302	5.18568	2.15e-07	8.53e-07	UP
GS1-24F4.2	24.7894	2.71664	0.523963	5.1848	2.16e-07	8.56e-07	UP
LINC00377	1.08881	-3.40419	0.656956	-5.18176	2.2e-07	8.68e-07	DOWN
MCPH1-AS1	53.4334	1.38711	0.267893	5.17783	2.24e-07	8.85e-07	UP
LINC00466	13.1404	3.41431	0.659681	5.1757	2.27e-07	8.94e-07	UP
TBX2-AS1	33.8097	-2.29605	0.443767	-5.174	2.29e-07	9e-07	DOWN
TMEM99	870.422	1.15819	0.223906	5.17267	2.31e-07	9.05e-07	UP
LINC00518	11.9832	4.96782	0.961611	5.16614	2.39e-07	9.36e-07	UP
AC112721.1	3.38597	4.10555	0.794792	5.16556	2.4e-07	9.37e-07	UP
SOX21-AS1	439.449	2.83729	0.549567	5.16278	2.43e-07	9.5e-07	UP
LINC00092	32.0549	-2.65625	0.514983	-5.15794	2.5e-07	9.73e-07	DOWN
DDX11-AS1	82.2344	1.35257	0.26244	5.15382	2.55e-07	9.93e-07	UP
LINC01198	2.23623	-3.48736	0.678709	-5.13823	2.77e-07	1.08e-06	DOWN
LINC01564	28.1563	3.3341	0.649175	5.13591	2.81e-07	1.09e-06	UP
VPS9D1-AS1	242.359	1.81846	0.354505	5.12958	2.9e-07	1.12e-06	UP
AC104794.4	7.67141	5.28762	1.03394	5.11405	3.15e-07	1.22e-06	UP
AL365361.1	90.3352	2.58753	0.50617	5.11197	3.19e-07	1.23e-06	UP
AC091132.1	1.08157	-2.6708	0.52297	-5.10699	3.27e-07	1.26e-06	DOWN
AL589986.2	3.95085	4.32783	0.848177	5.1025	3.35e-07	1.29e-06	UP
AL157904.1	6.55226	3.42665	0.672056	5.09876	3.42e-07	1.31e-06	UP
FAM218A	7.73886	-2.81628	0.552414	-5.09813	3.43e-07	1.31e-06	DOWN
AC114296.1	11.7561	4.48731	0.880798	5.09459	3.49e-07	1.34e-06	UP
MEG8	7.25809	-2.48647	0.488075	-5.09444	3.5e-07	1.34e-06	DOWN
AC000403.1	21.6396	1.92304	0.37865	5.07868	3.8e-07	1.45e-06	UP
AC139149.1	8.39293	2.411	0.474998	5.07581	3.86e-07	1.47e-06	UP
AC005256.1	11.4918	4.1752	0.822954	5.07344	3.91e-07	1.48e-06	UP
PCAT6	249.806	1.66898	0.329004	5.07282	3.92e-07	1.48e-06	UP
AC011498.1	4.38777	3.27469	0.645916	5.06984	3.98e-07	1.5e-06	UP
TONSL-AS1	10.5818	1.75397	0.346167	5.06685	4.04e-07	1.53e-06	UP
HOXA10-AS	19.5378	-2.03361	0.401883	-5.06019	4.19e-07	1.58e-06	DOWN
AC019117.1	28.1726	3.29966	0.652617	5.05604	4.28e-07	1.61e-06	UP
AC073333.1	2.97452	3.43152	0.679299	5.05156	4.38e-07	1.65e-06	UP
SNHG15	1681.93	1.10634	0.219371	5.04324	4.58e-07	1.72e-06	UP
AC007036.5	1.4818	-2.6407	0.523755	-5.04186	4.61e-07	1.73e-06	DOWN
AL161452.1	6.81684	2.19636	0.436126	5.03608	4.75e-07	1.78e-06	UP
AC234031.1	2.85279	3.3778	0.672414	5.02339	5.08e-07	1.89e-06	UP
LINC00211	1.31322	-2.97492	0.592227	-5.02327	5.08e-07	1.89e-06	DOWN
LINC00535	3.85898	-2.1303	0.424238	-5.02149	5.13e-07	1.91e-06	DOWN
AC010184.1	5.74838	4.63027	0.922949	5.01683	5.25e-07	1.95e-06	UP
AC009120.5	5.22022	-1.67072	0.33315	-5.01494	5.31e-07	1.97e-06	DOWN
GAS5-AS1	57.5157	1.02927	0.205334	5.01266	5.37e-07	1.99e-06	UP
LINC01341	35.7386	-2.43062	0.485109	-5.01045	5.43e-07	2.01e-06	DOWN
SNHG25	36.1273	1.80341	0.360304	5.00524	5.58e-07	2.06e-06	UP
FAM138B	1.17943	-6.597	1.31926	-5.00053	5.72e-07	2.11e-06	DOWN
LINC00894	152.208	-1.24057	0.248165	-4.99897	5.76e-07	2.12e-06	DOWN
LINC00484	5.44613	-1.82508	0.365261	-4.99665	5.83e-07	2.14e-06	DOWN
EHMT2-AS1	14.1613	1.84134	0.368678	4.99443	5.9e-07	2.16e-06	UP
LINC01451	310.827	2.38601	0.47782	4.99354	5.93e-07	2.17e-06	UP
AC084357.2	5.25825	2.72785	0.547926	4.97849	6.41e-07	2.34e-06	UP
FAM225B	22.223	-2.21278	0.444814	-4.97463	6.54e-07	2.38e-06	DOWN
NPTN-IT1	42.4787	-2.06861	0.417167	-4.95871	7.1e-07	2.58e-06	DOWN
LINC00987	20.9882	-1.79446	0.361912	-4.95829	7.11e-07	2.59e-06	DOWN
CELF2-AS1	4.06991	-3.304	0.668152	-4.94498	7.62e-07	2.76e-06	DOWN
FOXN3-AS1	151.943	1.33977	0.271376	4.93695	7.94e-07	2.88e-06	UP
LINC00996	36.7939	2.07976	0.421752	4.93124	8.17e-07	2.96e-06	UP
AC016831.6	23.0956	1.8896	0.383219	4.93087	8.19e-07	2.96e-06	UP
PACERR	10.0951	-2.42081	0.491287	-4.9275	8.33e-07	3e-06	DOWN
TAF1A-AS1	56.9313	1.416	0.287917	4.9181	8.74e-07	3.15e-06	UP
CYP51A1-AS1	5.5364	-1.39818	0.284329	-4.91748	8.77e-07	3.15e-06	DOWN
AC008781.1	2.95581	3.18972	0.649002	4.91481	8.89e-07	3.19e-06	UP
SAPCD1-AS1	4.10034	-2.00573	0.408401	-4.91118	9.05e-07	3.24e-06	DOWN
HOTTIP	94.3164	-2.82408	0.575445	-4.90765	9.22e-07	3.3e-06	DOWN
KIF9-AS1	51.2003	-1.17202	0.239123	-4.90131	9.52e-07	3.4e-06	DOWN
AC007389.2	6.0832	4.71116	0.961536	4.89962	9.6e-07	3.43e-06	UP
AC004870.4	1.55566	-8.02895	1.64315	-4.88632	1.03e-06	3.66e-06	DOWN
AC093865.1	3.05329	3.95794	0.810555	4.88301	1.04e-06	3.71e-06	UP
FAM83C-AS1	6.89645	2.37233	0.485848	4.88287	1.05e-06	3.71e-06	UP
MRPL23-AS1	7.15006	-3.67183	0.752416	-4.88006	1.06e-06	3.76e-06	DOWN
AC004000.1	8.55519	3.3178	0.679963	4.87938	1.06e-06	3.77e-06	UP
CD81-AS1	6.64282	-2.37959	0.488232	-4.87389	1.09e-06	3.87e-06	DOWN
AC073636.1	4.18056	-1.78855	0.367046	-4.87283	1.1e-06	3.88e-06	DOWN
AC108448.3	6.6137	4.35044	0.893498	4.869	1.12e-06	3.95e-06	UP
DNM3OS	122.784	-2.02873	0.417067	-4.86429	1.15e-06	4.04e-06	DOWN
SPATA41	116.784	1.35026	0.277713	4.86208	1.16e-06	4.08e-06	UP
AC007950.2	2.76504	-1.53383	0.315596	-4.8601	1.17e-06	4.11e-06	DOWN
LINC00324	139.954	1.27477	0.262456	4.85707	1.19e-06	4.17e-06	UP
AC026495.1	5.91189	4.91123	1.01349	4.84584	1.26e-06	4.41e-06	UP
AP001178.1	1.98121	3.33661	0.69133	4.82636	1.39e-06	4.85e-06	UP
AC098848.1	2.85658	3.62043	0.752005	4.81437	1.48e-06	5.15e-06	UP
YEATS2-AS1	48.7439	-1.27275	0.265202	-4.79918	1.59e-06	5.54e-06	DOWN
LINC00944	30.2852	2.71977	0.566853	4.79802	1.6e-06	5.56e-06	UP
POLR2J4	186	-1.76128	0.367285	-4.79542	1.62e-06	5.62e-06	DOWN
LINC01484	21.3305	2.98309	0.624411	4.77745	1.78e-06	6.14e-06	UP
LINC01489	1.79741	-3.15058	0.659508	-4.77716	1.78e-06	6.14e-06	DOWN
LINC00640	71.272	2.42675	0.508137	4.77577	1.79e-06	6.17e-06	UP
AL360091.1	2.58311	3.2313	0.676652	4.77542	1.79e-06	6.18e-06	UP
ITGA9-AS1	104.338	-1.12881	0.236614	-4.77065	1.84e-06	6.31e-06	DOWN
ALG13-AS1	4.13407	3.42909	0.719056	4.76887	1.85e-06	6.36e-06	UP
AC079949.1	8.1331	4.8894	1.02542	4.76821	1.86e-06	6.37e-06	UP
ZNF346-IT1	6.61007	-1.39011	0.29225	-4.75658	1.97e-06	6.74e-06	DOWN
AC011465.1	2.32466	3.32013	0.698497	4.75325	2e-06	6.84e-06	UP
AC118344.1	9.42285	2.54077	0.534797	4.75091	2.03e-06	6.91e-06	UP
AC055811.1	2.85234	3.61416	0.761145	4.74832	2.05e-06	6.99e-06	UP
IDI2-AS1	36.2676	1.77585	0.3741	4.74698	2.06e-06	7.03e-06	UP
AC092636.1	3.01966	3.69756	0.779214	4.74524	2.08e-06	7.08e-06	UP
AP002518.1	1.23127	-2.72096	0.57351	-4.7444	2.09e-06	7.09e-06	DOWN
AC005480.1	2.70914	3.06106	0.645672	4.74089	2.13e-06	7.21e-06	UP
AC020931.1	2.14886	3.21277	0.677922	4.73915	2.15e-06	7.26e-06	UP
LINC01348	97.6324	1.93567	0.409269	4.72959	2.25e-06	7.6e-06	UP
MIR202HG	1.04957	-3.96335	0.838684	-4.72568	2.29e-06	7.73e-06	DOWN
SLC8A1-AS1	7.27192	-3.04859	0.645806	-4.7206	2.35e-06	7.92e-06	DOWN
AC124944.3	23.0804	2.34712	0.49787	4.71432	2.43e-06	8.15e-06	UP
AL513318.1	188.161	4.30204	0.914253	4.70553	2.53e-06	8.5e-06	UP
GABPB1-AS1	735.034	-1.1784	0.250518	-4.70386	2.55e-06	8.56e-06	DOWN
AL121655.1	8.09773	1.95997	0.417298	4.69681	2.64e-06	8.85e-06	UP
SNHG9	244.613	1.38871	0.295849	4.69397	2.68e-06	8.96e-06	UP
AL049794.1	4.98385	3.22159	0.687207	4.68795	2.76e-06	9.21e-06	UP
AC009336.1	8.29627	2.87232	0.613237	4.68388	2.82e-06	9.38e-06	UP
LINC00649	525.059	1.84237	0.394192	4.67378	2.96e-06	9.83e-06	UP
PCED1B-AS1	293.512	1.76418	0.378008	4.66705	3.06e-06	1.01e-05	UP
AC003956.1	5.10781	3.03987	0.65194	4.6628	3.12e-06	1.03e-05	UP
LIFR-AS1	43.3426	-2.08722	0.448114	-4.65779	3.2e-06	1.06e-05	DOWN
KIAA0087	1.69023	-3.72319	0.799991	-4.65405	3.25e-06	1.07e-05	DOWN
LBX1-AS1	20.6146	4.85207	1.04447	4.64548	3.39e-06	1.12e-05	UP
HPN-AS1	14.0168	2.45443	0.529428	4.63599	3.55e-06	1.17e-05	UP
FAM201A	136.16	1.80239	0.388955	4.63392	3.59e-06	1.18e-05	UP
SPACA6P-AS	10.1263	-1.97952	0.427315	-4.63246	3.61e-06	1.19e-05	DOWN
PRR26	26.8568	-2.67988	0.579623	-4.62348	3.77e-06	1.24e-05	DOWN
AC004895.1	4.14803	2.9626	0.641541	4.61795	3.88e-06	1.27e-05	UP
AP001001.1	4.60515	3.11998	0.676446	4.61232	3.98e-06	1.3e-05	UP
AC141002.1	6.79924	2.29559	0.497998	4.60965	4.03e-06	1.32e-05	UP
LINC01215	19.5067	2.25992	0.490446	4.60788	4.07e-06	1.32e-05	UP
MYO16-AS1	27.4133	3.99612	0.867789	4.60495	4.13e-06	1.34e-05	UP
LINC00345	7.07405	2.65794	0.578994	4.59061	4.42e-06	1.44e-05	UP
MDS2	11.2277	2.54509	0.55446	4.59021	4.43e-06	1.44e-05	UP
DNM1P35	28.6822	-1.35197	0.295504	-4.57511	4.76e-06	1.54e-05	DOWN
AF186192.1	3.21834	-3.39225	0.742705	-4.56743	4.94e-06	1.6e-05	DOWN
AC027307.1	3.92372	3.35201	0.734483	4.56377	5.02e-06	1.62e-05	UP
TRG-AS1	135.666	1.88699	0.413598	4.56237	5.06e-06	1.63e-05	UP
PRR7-AS1	21.9019	1.53971	0.337631	4.56033	5.11e-06	1.64e-05	UP
AC007879.3	6.94015	2.57081	0.564313	4.55564	5.22e-06	1.68e-05	UP
AC055714.1	3.27557	4.05791	0.893545	4.54136	5.59e-06	1.79e-05	UP
AL132709.8	1.50362	-2.99851	0.661303	-4.53425	5.78e-06	1.85e-05	DOWN
AJ011932.1	3.63604	-3.23254	0.713267	-4.53202	5.84e-06	1.87e-05	DOWN
CTB-178M22.2	12.3655	2.2377	0.49386	4.53104	5.87e-06	1.88e-05	UP
AC006487.1	2.69147	3.77846	0.834044	4.5303	5.89e-06	1.88e-05	UP
ZEB1-AS1	177.596	-1.09525	0.241787	-4.52983	5.9e-06	1.88e-05	DOWN
TIPARP-AS1	49.9654	1.36942	0.302463	4.52755	5.97e-06	1.9e-05	UP
HOXC-AS3	32.162	3.42382	0.757209	4.52163	6.14e-06	1.95e-05	UP
SRRM2-AS1	82.0087	1.05074	0.232659	4.51621	6.3e-06	2e-05	UP
LINC00265	208.409	-1.17768	0.260801	-4.51561	6.31e-06	2e-05	DOWN
IL21R-AS1	5.61331	-1.90075	0.421013	-4.51469	6.34e-06	2.01e-05	DOWN
AC008514.1	16.2182	3.41541	0.757121	4.51105	6.45e-06	2.04e-05	UP
AL162311.1	2.12114	3.19353	0.710693	4.49354	7e-06	2.21e-05	UP
AL157931.1	26.5242	5.31193	1.18233	4.49276	7.03e-06	2.22e-05	UP
SLC25A21-AS1	73.384	-1.22367	0.273012	-4.48212	7.39e-06	2.33e-05	DOWN
LINC00315	1.49645	-2.09624	0.467949	-4.47964	7.48e-06	2.35e-05	DOWN
SSTR5-AS1	27.5788	4.09866	0.91506	4.47912	7.5e-06	2.35e-05	UP
AC025918.1	2.01254	3.11441	0.695517	4.47784	7.54e-06	2.36e-05	UP
AC144450.1	5.80954	4.88752	1.09228	4.47461	7.65e-06	2.4e-05	UP
MSC-AS1	123.429	-1.88578	0.421986	-4.46883	7.87e-06	2.46e-05	DOWN
AP002852.1	2.14623	3.20428	0.717335	4.46692	7.94e-06	2.48e-05	UP
AP000345.2	13.234	2.37934	0.533802	4.45735	8.3e-06	2.59e-05	UP
LINC00659	8.02374	3.91775	0.879252	4.45577	8.36e-06	2.6e-05	UP
CAHM	24.6337	-1.02862	0.231142	-4.45016	8.58e-06	2.67e-05	DOWN
ADD3-AS1	12.3744	-1.6414	0.368921	-4.44918	8.62e-06	2.68e-05	DOWN
ZNF252P-AS1	20.252	-1.15241	0.259444	-4.44186	8.92e-06	2.77e-05	DOWN
LINC01203	8.76637	2.77122	0.624158	4.43993	9e-06	2.79e-05	UP
FENDRR	111.215	-2.65298	0.597722	-4.43848	9.06e-06	2.8e-05	DOWN
PSORS1C3	72.1629	3.03137	0.683437	4.43548	9.19e-06	2.84e-05	UP
COL4A2-AS2	1.31032	-2.94837	0.66506	-4.43324	9.28e-06	2.86e-05	DOWN
LINC00390	6.26273	2.69328	0.607553	4.433	9.29e-06	2.86e-05	UP
AL590822.1	2.95719	3.43124	0.77444	4.4306	9.4e-06	2.89e-05	UP
AFAP1-AS1	373.83	3.42736	0.774295	4.42642	9.58e-06	2.94e-05	UP
AC007743.1	29.7481	-2.72775	0.617253	-4.41917	9.91e-06	3.04e-05	DOWN
LINC01287	2.41371	-2.35088	0.53211	-4.41802	9.96e-06	3.05e-05	DOWN
LINC01474	2.5447	-3.05666	0.692687	-4.41276	1.02e-05	3.12e-05	DOWN
TMEM105	56.8034	2.2827	0.517412	4.41177	1.03e-05	3.13e-05	UP
AL589843.1	49.6871	2.28132	0.517243	4.41053	1.03e-05	3.14e-05	UP
LINC01607	14.2005	2.27606	0.516149	4.4097	1.04e-05	3.15e-05	UP
AC084262.2	4.8372	3.89742	0.883979	4.40895	1.04e-05	3.15e-05	UP
PRKCQ-AS1	271.851	1.7061	0.387157	4.40675	1.05e-05	3.18e-05	UP
LINC00322	3.21015	3.54711	0.805481	4.40372	1.06e-05	3.22e-05	UP
NRIR	39.569	2.23602	0.508064	4.40107	1.08e-05	3.26e-05	UP
AC007128.1	17.8189	4.81505	1.09443	4.3996	1.08e-05	3.28e-05	UP
FAM66A	2.50397	-2.7883	0.634048	-4.39762	1.09e-05	3.3e-05	DOWN
LINC01402	3.12076	3.51034	0.798843	4.39428	1.11e-05	3.35e-05	UP
RHOA-IT1	5.25556	-1.52065	0.346122	-4.39339	1.12e-05	3.36e-05	DOWN
MIR181A2HG	24.9102	2.14225	0.488627	4.38423	1.16e-05	3.5e-05	UP
AC139530.1	1.9526	3.07496	0.701625	4.38262	1.17e-05	3.52e-05	UP
UBE2Q1-AS1	6.73553	1.8876	0.431593	4.37357	1.22e-05	3.66e-05	UP
CARD8-AS1	181.541	1.12739	0.258016	4.36945	1.25e-05	3.73e-05	UP
FAM53B-AS1	1.78808	-1.64872	0.377604	-4.36629	1.26e-05	3.77e-05	DOWN
LINC01134	34.4219	1.70868	0.392419	4.35423	1.34e-05	3.98e-05	UP
LINC01331	3.72027	3.51674	0.810605	4.33841	1.44e-05	4.27e-05	UP
AC072062.1	2.37701	-1.8383	0.424733	-4.32813	1.5e-05	4.47e-05	DOWN
ZNF667-AS1	178.067	-2.32865	0.538342	-4.3256	1.52e-05	4.52e-05	DOWN
KMT2E-AS1	238.817	1.01507	0.235399	4.3121	1.62e-05	4.79e-05	UP
ERI3-IT1	1.88417	-1.76781	0.410551	-4.30595	1.66e-05	4.92e-05	DOWN
AC099050.1	2.90166	2.92107	0.678712	4.30384	1.68e-05	4.95e-05	UP
STARD13-AS	4.11396	-2.26859	0.527954	-4.29695	1.73e-05	5.09e-05	DOWN
LINC00571	9.91334	1.83594	0.427313	4.29646	1.74e-05	5.1e-05	UP
LINC00867	3.57121	3.46109	0.805727	4.29561	1.74e-05	5.11e-05	UP
AC089983.1	3.71805	4.24041	0.987402	4.29451	1.75e-05	5.13e-05	UP
FLJ31104	11.3646	-1.30804	0.305047	-4.28799	1.8e-05	5.28e-05	DOWN
RMST	3.34655	-4.91909	1.14748	-4.28687	1.81e-05	5.3e-05	DOWN
AF213884.3	1.75917	2.91312	0.680233	4.28253	1.85e-05	5.39e-05	UP
AC016405.1	1.72538	2.88659	0.674734	4.27811	1.88e-05	5.5e-05	UP
LINC00205	511.265	1.06108	0.24813	4.27631	1.9e-05	5.53e-05	UP
AC069542.1	1.6987	3.11183	0.727988	4.27457	1.92e-05	5.56e-05	UP
AC103563.2	5.97963	4.92897	1.15314	4.2744	1.92e-05	5.56e-05	UP
LINC01320	16.7809	-3.81623	0.893938	-4.26901	1.96e-05	5.69e-05	DOWN
FMR1-IT1	10.3191	1.5877	0.372471	4.26261	2.02e-05	5.84e-05	UP
AL365181.2	197.68	2.22255	0.521517	4.26171	2.03e-05	5.86e-05	UP
TNKS2-AS1	30.446	1.49275	0.350471	4.25928	2.05e-05	5.91e-05	UP
RBPMS-AS1	35.4004	-1.71227	0.402233	-4.25691	2.07e-05	5.97e-05	DOWN
RFPL1S	115.772	2.81338	0.661359	4.25394	2.1e-05	6.04e-05	UP
AL355512.1	10.4913	2.7822	0.65542	4.24491	2.19e-05	6.28e-05	UP
AL135791.1	4.42669	2.49632	0.588504	4.2418	2.22e-05	6.35e-05	UP
BACH1-IT1	14.7186	1.28159	0.302136	4.24177	2.22e-05	6.35e-05	UP
AC005083.1	97.0967	1.34103	0.316813	4.23288	2.31e-05	6.6e-05	UP
AC015726.1	41.1513	1.23486	0.291877	4.23076	2.33e-05	6.65e-05	UP
SMAD9-IT1	1.27662	-2.90266	0.68676	-4.2266	2.37e-05	6.77e-05	DOWN
AL512506.1	2.72906	2.82553	0.669523	4.22022	2.44e-05	6.96e-05	UP
LBX2-AS1	304.922	1.17383	0.278691	4.21194	2.53e-05	7.21e-05	UP
LINC01405	3.10105	3.97926	0.946452	4.2044	2.62e-05	7.44e-05	UP
LINC01366	6.14547	-1.84014	0.437716	-4.20396	2.62e-05	7.45e-05	DOWN
LINC01163	1.98001	-3.086	0.734949	-4.19894	2.68e-05	7.61e-05	DOWN
UBOX5-AS1	10.8867	1.26882	0.302217	4.19837	2.69e-05	7.62e-05	UP
LINC01517	4.19677	4.41518	1.05236	4.1955	2.72e-05	7.7e-05	UP
AC023590.1	6.9971	1.95838	0.46801	4.18449	2.86e-05	8.08e-05	UP
FGF14-AS2	30.1441	-1.96054	0.469805	-4.17309	3e-05	8.48e-05	DOWN
AL121899.1	4.15723	4.1604	0.99976	4.1614	3.16e-05	8.92e-05	UP
FAM85B	2.87085	-2.0623	0.49563	-4.16096	3.17e-05	8.92e-05	DOWN
SLC25A30-AS1	1.53542	-1.81407	0.436477	-4.15617	3.24e-05	9.1e-05	DOWN
AC005740.3	1.31343	-1.95042	0.470129	-4.1487	3.34e-05	9.39e-05	DOWN
PPP4R1-AS1	10.2727	1.76143	0.426048	4.13435	3.56e-05	9.98e-05	UP
AC011453.1	2.3828	3.35878	0.816264	4.11481	3.87e-05	0.000108546	UP
LINC00216	6.725	-1.17651	0.286106	-4.11214	3.92e-05	0.000109676	DOWN
CACNA1C-AS2	4.62098	-1.88342	0.458316	-4.10943	3.97e-05	0.000110837	DOWN
IPO9-AS1	6.56606	-1.3003	0.316543	-4.10782	3.99e-05	0.000111473	DOWN
SUCLG2-AS1	76.2124	1.40436	0.341985	4.1065	4.02e-05	0.000111973	UP
LINC01532	3.73885	-4.47465	1.0918	-4.09843	4.16e-05	0.000115811	DOWN
UBE2R2-AS1	7.76183	1.68061	0.41099	4.08918	4.33e-05	0.000120377	UP
LINC01301	46.8212	1.50843	0.368978	4.08812	4.35e-05	0.000120781	UP
RAP2C-AS1	58.4139	-1.02445	0.250779	-4.08506	4.41e-05	0.000122239	DOWN
LINC01385	3.56802	3.94186	0.966418	4.07884	4.53e-05	0.000125401	UP
C2-AS1	6.52638	2.71784	0.6664	4.0784	4.53e-05	0.000125488	UP
U91328.1	105.919	1.43552	0.352252	4.07526	4.6e-05	0.000127037	UP
WNT5A-AS1	36.5993	2.04942	0.502941	4.07486	4.6e-05	0.000127102	UP
LINC01426	61.4545	2.23059	0.548312	4.0681	4.74e-05	0.000130689	UP
AL139398.1	3.33993	2.64775	0.651238	4.06571	4.79e-05	0.000131876	UP
RUNDC3A-AS1	29.1612	2.12276	0.522678	4.06132	4.88e-05	0.000134219	UP
AL136456.1	1.44049	2.87472	0.708843	4.0555	5e-05	0.000137439	UP
PHEX-AS1	1.71923	-4.08662	1.00779	-4.05503	5.01e-05	0.000137553	DOWN
LINC01121	2.53929	-2.26181	0.558188	-4.05206	5.08e-05	0.000139114	DOWN
AL031768.1	4.69884	2.29903	0.567405	4.05183	5.08e-05	0.000139114	UP
AC097532.2	2.9599	2.94436	0.727283	4.04843	5.16e-05	0.000140808	UP
LINC00654	47.8212	-1.77413	0.438533	-4.04561	5.22e-05	0.000142347	DOWN
LINC01337	5.812	2.10479	0.520501	4.04379	5.26e-05	0.000143286	UP
AP000781.1	1.26375	2.68892	0.665169	4.04246	5.29e-05	0.000143929	UP
LMO7-AS1	41.3788	1.28689	0.319227	4.03125	5.55e-05	0.000150608	UP
AC103563.7	8.0047	4.14348	1.02892	4.02701	5.65e-05	0.000152984	UP
KDM5C-IT1	1.19807	-1.75138	0.435438	-4.02212	5.77e-05	0.000156017	DOWN
MYHAS	3.26554	-2.436	0.606273	-4.01799	5.87e-05	0.000158583	DOWN
IGF2-AS	7.54328	-2.46001	0.612898	-4.01373	5.98e-05	0.000161282	DOWN
HOXC-AS1	31.0863	1.7457	0.435132	4.01188	6.02e-05	0.00016236	UP
LINC01119	16.9829	-1.38804	0.346189	-4.00948	6.09e-05	0.000163828	DOWN
LINC01422	17.8067	-1.53774	0.383788	-4.00675	6.16e-05	0.00016554	DOWN
AC018685.2	6.58297	5.06828	1.26693	4.00045	6.32e-05	0.000169808	UP
FSIP2-AS1	3.66861	-1.87907	0.469876	-3.99908	6.36e-05	0.000170589	DOWN
UFL1-AS1	2.07145	2.90874	0.727546	3.99801	6.39e-05	0.000171161	UP
AL157871.2	19.6457	2.39848	0.600567	3.9937	6.5e-05	0.000174101	UP
LINC01150	6.5556	2.06427	0.516938	3.99327	6.52e-05	0.000174214	UP
TRHDE-AS1	91.4256	-3.84599	0.963228	-3.99282	6.53e-05	0.000174344	DOWN
BANCR	5.75942	3.41109	0.854486	3.99198	6.55e-05	0.000174757	UP
ODF2-AS1	1.25734	-1.76145	0.441385	-3.99074	6.59e-05	0.000175464	DOWN
GRPEL2-AS1	1.20445	-1.93779	0.486629	-3.98206	6.83e-05	0.000181791	DOWN
C17orf77	16.5426	5.67491	1.42772	3.9748	7.04e-05	0.000187208	UP
AC093928.1	4.72811	2.77117	0.697314	3.97406	7.07e-05	0.000187568	UP
LINC01352	3.10844	-1.99011	0.500993	-3.97234	7.12e-05	0.000188716	DOWN
AL023806.1	3.65932	-1.43096	0.361253	-3.9611	7.46e-05	0.000197594	DOWN
C1orf195	2.31439	2.83008	0.71667	3.94893	7.85e-05	0.000207673	UP
AC107993.1	1.87495	3.25287	0.824086	3.94724	7.91e-05	0.000208896	UP
AC108676.1	47.8172	3.21082	0.813522	3.94682	7.92e-05	0.000209026	UP
AC073130.2	4.65067	2.03724	0.516657	3.94311	8.04e-05	0.000212037	UP
ZNF32-AS2	16.7102	-1.12746	0.286005	-3.9421	8.08e-05	0.000212688	DOWN
FAM222A-AS1	9.21196	2.34018	0.593827	3.94084	8.12e-05	0.000213567	UP
LINC00574	6.35975	-1.95477	0.496153	-3.93985	8.15e-05	0.000214201	DOWN
AP003096.1	3.46458	2.49104	0.633011	3.93522	8.31e-05	0.000218121	UP
LINC00310	10.695	-1.04157	0.26509	-3.92912	8.53e-05	0.000223217	DOWN
AC007750.1	10.8926	2.42455	0.617394	3.92708	8.6e-05	0.000224861	UP
TTLL11-IT1	19.4495	2.60319	0.66299	3.92644	8.62e-05	0.000225194	UP
CTD-2297D10.2	2.82953	-2.72768	0.696069	-3.91869	8.9e-05	0.000232295	DOWN
RPS6KA2-IT1	3.51146	3.19098	0.814626	3.91711	8.96e-05	0.000233552	UP
AC009403.2	11.5446	-2.17348	0.555023	-3.91602	9e-05	0.000234346	DOWN
LINC00629	7.46461	-1.65379	0.422436	-3.91489	9.04e-05	0.000235179	DOWN
AC091178.2	9.65811	1.91455	0.489085	3.91455	9.06e-05	0.000235245	UP
AC004637.1	1.8031	-2.99601	0.765958	-3.91146	9.17e-05	0.000238002	DOWN
AC007279.1	2.16867	2.73669	0.701292	3.90236	9.53e-05	0.000246575	UP
LINC00970	5.98038	4.92926	1.26428	3.89888	9.66e-05	0.000249637	UP
IDH1-AS1	20.378	1.36632	0.350443	3.89882	9.67e-05	0.000249637	UP
UMODL1-AS1	2.3913	-2.88239	0.739507	-3.89772	9.71e-05	0.000250492	DOWN
LINC01118	2.87089	-1.61247	0.414122	-3.89371	9.87e-05	0.000254095	DOWN
FGF13-AS1	1.58839	-3.71114	0.954182	-3.88934	0.000100517	0.000258425	DOWN
SIAH2-AS1	19.7098	1.53863	0.395699	3.88839	0.000100913	0.00025915	UP
AC016575.1	2.44223	2.91014	0.74914	3.88464	0.00010248	0.000262879	UP
HAS2-AS1	34.6007	2.22003	0.571616	3.88377	0.000102848	0.000263526	UP
AC010329.1	5.82437	4.89081	1.2594	3.88345	0.000102983	0.000263575	UP
LOH12CR2	28.2393	-1.00008	0.257559	-3.88294	0.000103201	0.000263839	DOWN
AL161908.1	3.67523	4.22679	1.08927	3.8804	0.000104286	0.000266315	UP
TBL1XR1-AS1	1.39788	-2.03758	0.526098	-3.87301	0.000107501	0.000274218	DOWN
PLCE1-AS1	1.54328	-2.69299	0.69653	-3.86629	0.000110505	0.000281299	DOWN
AC061992.2	29.8016	1.78106	0.460669	3.86625	0.000110523	0.000281299	UP
SCOC-AS1	40.0083	1.11371	0.288232	3.86392	0.00011158	0.000283672	UP
LINC00235	35.5046	-1.011	0.261772	-3.86213	0.000112404	0.000285449	DOWN
AP002498.1	3.05476	3.9592	1.02572	3.85993	0.000113418	0.000287703	UP
SERPINB9P1	226.925	1.61388	0.418783	3.85374	0.000116329	0.00029476	UP
MIR503HG	184.964	-1.43313	0.372328	-3.8491	0.000118551	0.000300057	DOWN
LINC00189	2.26929	-1.8419	0.478712	-3.84762	0.000119273	0.000301435	DOWN
LIPE-AS1	111.372	1.48189	0.385164	3.84744	0.000119359	0.000301435	UP
AP001056.1	1.75843	-2.68478	0.697981	-3.84649	0.000119821	0.000302267	DOWN
CFAP44-AS1	3.5635	2.52955	0.658436	3.84176	0.000122157	0.000307818	UP
AP003307.1	4.55818	2.39432	0.623392	3.84079	0.000122638	0.000308691	UP
LINC01013	4.31895	-1.67389	0.435919	-3.83991	0.000123078	0.000309458	DOWN
LINC00589	5.1594	3.01416	0.785137	3.83903	0.000123522	0.000310231	UP
NR2F1-AS1	199.64	-1.55876	0.406134	-3.83805	0.000124016	0.000311129	DOWN
AC090607.1	1.67055	2.60487	0.679085	3.83586	0.000125128	0.000313575	UP
C2orf27A	160.671	1.15753	0.302115	3.83141	0.000127411	0.000318946	UP
LINC01569	165.9	1.03503	0.270305	3.8291	0.000128611	0.000321597	UP
AL359546.1	3.49666	2.72814	0.713704	3.82251	0.0001321	0.000329961	UP
LINC00392	31.1071	5.44057	1.4256	3.81635	0.000135442	0.00033757	UP
AC061975.1	2.1672	3.46376	0.907698	3.81598	0.000135643	0.000337703	UP
LINC01033	2.63613	3.26022	0.855185	3.8123	0.000137678	0.000341652	UP
LINC00381	3.87259	3.57434	0.938334	3.80924	0.000139393	0.000345531	UP
CALML3-AS1	1019.89	1.91592	0.503585	3.80456	0.000142054	0.000351745	UP
STX17-AS1	37.4256	1.07034	0.281954	3.79615	0.000146961	0.000363107	UP
HIF1A-AS1	10.0727	1.8562	0.489516	3.79191	0.000149496	0.000368795	UP
DIRC3	14.2988	-1.79886	0.474414	-3.79176	0.000149586	0.000368795	DOWN
LINC01088	74.0346	-2.30375	0.60801	-3.78899	0.000151259	0.000372518	DOWN
LINC00456	2.26104	3.52198	0.932285	3.7778	0.000158221	0.000389245	UP
SMIM2-AS1	23.7706	1.46324	0.387461	3.77647	0.000159066	0.000390901	UP
RASSF8-AS1	123.457	-1.36044	0.360376	-3.77506	0.000159972	0.000392705	DOWN
MESTIT1	5.54359	-1.27738	0.339832	-3.75887	0.000170681	0.000418543	DOWN
ACVR2B-AS1	51.1728	-1.08314	0.288627	-3.75274	0.000174913	0.000428461	DOWN
AC092666.1	3.3632	3.3715	0.898675	3.75164	0.000175684	0.000429889	UP
LINC00920	42.186	1.25051	0.333388	3.7509	0.000176198	0.000430685	UP
RAD21-AS1	15.9951	1.28024	0.34176	3.74604	0.00017965	0.000438186	UP
CRTC3-AS1	10.1319	1.06311	0.283825	3.74566	0.00017992	0.000438374	UP
AC104590.1	4.64277	2.28279	0.610916	3.73667	0.00018647	0.000453849	UP
RNF217-AS1	77.1916	1.60254	0.429034	3.73523	0.000187541	0.000455694	UP
AL442067.1	2.06951	2.66322	0.713023	3.73512	0.000187627	0.000455694	UP
HAR1A	25.6282	-1.64738	0.441285	-3.73314	0.000189109	0.000458806	DOWN
LINC00840	3.12628	-1.76556	0.473153	-3.73148	0.00019036	0.00046135	DOWN
LINC01475	5.58805	4.83151	1.29926	3.71865	0.000200288	0.000484382	UP
AL121652.1	2.25836	2.55409	0.687429	3.71542	0.000202868	0.000490104	UP
DRAIC	25.3649	1.51284	0.407579	3.71177	0.000205817	0.000496702	UP
EGFR-AS1	10.3316	-2.07054	0.558947	-3.70436	0.000211927	0.000510369	DOWN
AC073869.1	7.05292	1.99907	0.539796	3.70338	0.000212748	0.000511806	UP
AC117490.2	3.2262	2.39556	0.646932	3.70295	0.000213106	0.000512126	UP
DNAH10OS	53.2516	-1.49821	0.405094	-3.69842	0.000216947	0.00052081	DOWN
AC026803.1	3.66821	2.19154	0.592622	3.69805	0.000217266	0.000521028	UP
CSE1L-AS1	1.32485	2.74294	0.74197	3.69683	0.000218306	0.000522972	UP
MNX1-AS2	6.98974	2.57071	0.698313	3.68131	0.000232039	0.000555289	UP
PKN2-AS1	15.1206	1.4278	0.388806	3.67226	0.000240413	0.000574125	UP
AC138811.1	1.51778	2.94669	0.802762	3.67069	0.000241893	0.000577056	UP
NCBP2-AS1	10.8598	1.47435	0.401936	3.66812	0.000244342	0.000582289	UP
AC016597.1	3.73021	1.81359	0.494582	3.66691	0.000245501	0.00058444	UP
AL139021.1	4.17446	1.99402	0.5439	3.66615	0.000246228	0.000585561	UP
LINC01353	6.97217	1.46462	0.400414	3.65776	0.000254434	0.000604445	UP
GAPLINC	20.5725	1.61558	0.441972	3.65538	0.000256799	0.000609431	UP
ZNF32-AS1	9.46906	1.1765	0.322008	3.65365	0.000258543	0.000612931	UP
AC005753.1	6.06687	-1.92837	0.528077	-3.65168	0.000260528	0.000616998	DOWN
AC139887.4	8.68655	1.56597	0.429275	3.64795	0.000264341	0.000624731	UP
AC005288.1	1.36583	2.55142	0.699842	3.64572	0.000266648	0.000629531	UP
AC004846.1	31.7517	1.70683	0.469213	3.63765	0.000275141	0.000648913	UP
MIR181A1HG	1.30527	-2.31824	0.638463	-3.63096	0.000282365	0.000665263	DOWN
OGFR-AS1	6.51481	1.48547	0.409529	3.62727	0.000286435	0.000674156	UP
AC133644.2	4.07465	-1.30994	0.36162	-3.62242	0.000291856	0.000685767	DOWN
AC011306.1	1.41118	2.84419	0.785525	3.62075	0.000293746	0.000689233	UP
HMMR-AS1	1.24585	2.67089	0.739296	3.61275	0.00030297	0.000708888	UP
AC115099.1	2.69897	3.04993	0.84423	3.61267	0.000303055	0.000708888	UP
LINC01146	12.55	1.58384	0.43876	3.60981	0.000306418	0.00071602	UP
FLJ13224	3.1993	-1.37585	0.381525	-3.60618	0.000310734	0.000725364	DOWN
AC005082.1	195.376	2.24619	0.62354	3.60232	0.000315391	0.000734732	UP
AL121989.1	1.90615	3.03447	0.846348	3.58537	0.000336597	0.000783335	UP
Z93241.1	2.22713	2.53311	0.706887	3.58347	0.000339054	0.000788249	UP
LINC01143	9.89036	3.24806	0.907336	3.57977	0.000343893	0.000798685	UP
IGBP1-AS1	9.58254	1.26443	0.353384	3.57806	0.000346157	0.000803127	UP
LINC00898	6.62393	4.35213	1.22052	3.5658	0.000362751	0.000840771	UP
AC093151.2	3.02671	2.73566	0.767766	3.56314	0.000366441	0.000848464	UP
AL627171.1	3.47845	1.84754	0.51875	3.56153	0.000368706	0.000852843	UP
LINC01277	11.3425	1.33736	0.375882	3.55792	0.000373804	0.000863513	UP
AC005599.1	1.51719	2.70008	0.758933	3.55773	0.000374076	0.000863513	UP
LINC00624	17.1291	-1.36489	0.384327	-3.55137	0.000383237	0.000883767	DOWN
WDR7-OT1	1.18825	-1.84198	0.519246	-3.54742	0.000389025	0.00089621	DOWN
AC024084.1	2.34063	3.32955	0.939819	3.54276	0.000395967	0.000910366	UP
FLNB-AS1	61.223	-1.40812	0.397519	-3.54228	0.000396687	0.000911097	DOWN
AC079790.2	1.15663	2.31808	0.654452	3.54201	0.000397083	0.000911097	UP
TTLL7-IT1	1.38046	-2.21116	0.624837	-3.53879	0.000401972	0.000920464	DOWN
LINC01270	49.7948	1.2826	0.362692	3.53633	0.00040572	0.000927186	UP
TMEM75	3.39872	-1.60436	0.453776	-3.53557	0.000406891	0.000928931	DOWN
LINC01344	4.83081	2.92584	0.828746	3.53044	0.000414862	0.000946185	UP
PRICKLE2-AS1	2.5973	-4.80382	1.36311	-3.52417	0.000424814	0.000967915	DOWN
ZFX-AS1	1.37098	2.55115	0.724051	3.52344	0.000425977	0.000969597	UP
CASC18	7.86622	-1.76723	0.501748	-3.52215	0.000428055	0.000973357	DOWN
SFTA1P	33.0719	3.93989	1.12765	3.49388	0.000476051	0.00107874	UP
AL590787.1	2.44156	2.41861	0.692724	3.49144	0.000480421	0.00108639	UP
ARF4-AS1	4.87145	-1.29764	0.371673	-3.49133	0.000480617	0.00108639	DOWN
LINC01094	125.653	1.07712	0.308593	3.49043	0.000482246	0.00108899	UP
SNHG14	830.173	-1.48794	0.426742	-3.48674	0.000488952	0.00110304	DOWN
LINC01220	16.6655	1.24226	0.356463	3.48497	0.000492186	0.00110924	UP
AL139351.1	7.31637	2.72386	0.782407	3.48139	0.000498822	0.00112309	UP
AC092580.2	1.45067	2.8874	0.829767	3.47977	0.000501848	0.00112879	UP
LINC00525	10.4347	2.44006	0.702125	3.47525	0.00051037	0.00114683	UP
AC084809.2	8.32516	1.53103	0.440907	3.47245	0.00051574	0.00115775	UP
PRRT3-AS1	56.3178	1.19483	0.345047	3.46281	0.000534557	0.00119881	UP
LINC01132	41.8489	1.16781	0.337539	3.45978	0.000540608	0.00121119	UP
LINC00524	12.8036	3.10063	0.899725	3.4462	0.000568523	0.00127249	UP
AC005071.1	1.17494	2.34554	0.680745	3.44556	0.000569888	0.0012738	UP
LINC00968	6.67858	-1.85983	0.539801	-3.4454	0.000570223	0.0012738	DOWN
LINC01558	11.1872	-2.07356	0.601961	-3.44468	0.000571741	0.00127594	DOWN
LINC01354	26.7171	-1.93505	0.561825	-3.44422	0.000572699	0.00127683	DOWN
AC008752.1	1.14231	2.53712	0.738605	3.43501	0.000592523	0.00131974	UP
AC092574.2	1.33067	2.51499	0.732451	3.43366	0.000595481	0.00132503	UP
XIST	4585.78	-1.78188	0.519191	-3.43204	0.000599067	0.00133172	DOWN
AC073257.1	4.90152	2.67339	0.779176	3.43105	0.000601257	0.00133528	UP
HOTAIRM1	105.117	-1.05295	0.307792	-3.42099	0.000623932	0.00138429	DOWN
LINC01123	63.2394	-1.13596	0.332488	-3.41654	0.000634214	0.00140574	DOWN
LINC01116	380.154	1.71967	0.503417	3.41599	0.000635508	0.00140724	UP
AF106564.1	9.69808	3.38136	0.990178	3.4149	0.000638053	0.00141032	UP
AC004448.2	2.96739	-1.91605	0.561091	-3.41487	0.000638134	0.00141032	DOWN
LINC01579	17.5568	-2.1712	0.636885	-3.40909	0.000651802	0.00143791	DOWN
OSMR-AS1	54.2158	1.01957	0.299076	3.40906	0.00065188	0.00143791	UP
DNAH17-AS1	13.5986	2.28993	0.672936	3.4029	0.000666745	0.00146928	UP
LINC01549	3.38198	3.13562	0.923318	3.39603	0.000683708	0.00150521	UP
AC092155.1	1.02559	-2.04795	0.603513	-3.39337	0.000690374	0.00151842	DOWN
AC011363.1	1.43534	2.86701	0.844964	3.39305	0.000691181	0.00151874	UP
ZNF503-AS1	227.214	1.79279	0.5285	3.39222	0.000693298	0.00152192	UP
LINC01482	5.83979	-1.50161	0.442917	-3.39028	0.000698217	0.00153125	DOWN
AC099314.1	1.16372	2.55952	0.755662	3.38713	0.000706289	0.00154567	UP
AC243654.1	1.02259	2.3827	0.703501	3.38692	0.000706825	0.00154567	UP
NARF-IT1	14.2448	-1.04278	0.308109	-3.38445	0.000713216	0.00155816	DOWN
AC117422.1	2.65571	3.75708	1.11028	3.38391	0.000714605	0.00155948	UP
AC009159.1	1.83885	2.9865	0.882617	3.38369	0.000715188	0.00155948	UP
DSCAS	2.28497	2.32286	0.687686	3.37779	0.000730706	0.0015918	UP
LINC01012	55.4901	1.39669	0.413622	3.37672	0.000733558	0.00159649	UP
LINC01562	2.80839	-1.1847	0.352014	-3.3655	0.000764042	0.00166125	DOWN
AC020934.1	1.61276	3.03643	0.904494	3.35705	0.000787797	0.00171127	UP
HLCS-IT1	1.77844	2.45129	0.732059	3.34848	0.000812552	0.00176336	UP
C5orf64	1.58346	-1.63817	0.489942	-3.3436	0.000827	0.00179218	DOWN
RERG-IT1	1.23845	-2.70195	0.808131	-3.34346	0.000827403	0.00179218	DOWN
LINC00623	198.391	1.02513	0.306654	3.34295	0.000828942	0.00179382	UP
PGM5P3-AS1	3.3827	-3.28659	0.983583	-3.34145	0.00083342	0.0018018	DOWN
TBX5-AS1	1.83657	-2.92297	0.874846	-3.34113	0.000834383	0.00180217	DOWN
LINC00106	37.8912	1.04243	0.312098	3.34006	0.000837608	0.00180661	UP
AC099796.2	1.73951	3.15138	0.943565	3.33986	0.000838195	0.00180661	UP
C15orf56	23.4169	1.03218	0.309067	3.33966	0.000838811	0.00180661	UP
LINC01036	5.75353	2.61594	0.784462	3.3347	0.00085393	0.0018368	UP
MIAT	641.646	1.43625	0.430725	3.33449	0.000854558	0.0018368	UP
LINC00426	73.3994	1.40795	0.422757	3.33039	0.000867242	0.00186082	UP
USP30-AS1	21.0956	1.54986	0.465801	3.32729	0.00087694	0.00187986	UP
LINC00111	2.10862	2.69488	0.810593	3.32457	0.000885539	0.00189652	UP
AC112721.2	5.18949	2.07736	0.626959	3.3134	0.000921697	0.0019721	UP
LINC00626	9.39535	3.75384	1.13414	3.30987	0.000933408	0.00199446	UP
AC099332.1	4.52532	1.9057	0.575789	3.30972	0.000933894	0.00199446	UP
STAU2-AS1	14.3173	1.60747	0.486464	3.3044	0.000951786	0.00203077	UP
LINC00184	18.9944	1.81168	0.548321	3.30405	0.000952988	0.00203144	UP
AC006994.1	2.14954	-1.89808	0.575163	-3.30008	0.000966574	0.00205656	DOWN
LINC01267	6.44725	-1.70887	0.518112	-3.29826	0.000972855	0.002068	DOWN
FARSA-AS1	1.59509	2.29044	0.695934	3.29118	0.000997688	0.00211684	UP
NEBL-AS1	12.8307	1.28154	0.389463	3.29052	0.00100001	0.0021198	UP
LINC00384	1.22346	-2.23087	0.678483	-3.28803	0.00100892	0.00213669	DOWN
ELFN2	2.56042	-3.24639	0.992071	-3.27234	0.00106662	0.00225681	DOWN
BCAR4	3.40188	4.11579	1.25967	3.26737	0.00108553	0.00229257	UP
LINC00900	21.9315	-1.3203	0.404394	-3.26489	0.00109508	0.00230848	DOWN
ZFHX4-AS1	5.0524	-2.4622	0.75666	-3.25404	0.00113775	0.00239621	DOWN
LINC01587	8.53402	2.46908	0.760948	3.24475	0.00117555	0.00247126	UP
AC010969.1	6.9701	2.81526	0.868096	3.24303	0.00118268	0.00248394	UP
AC159540.1	26.8861	-11.6558	3.59453	-3.24266	0.00118421	0.00248488	DOWN
AC087501.1	1.32721	2.51529	0.775777	3.24228	0.00118575	0.00248584	UP
LINC01556	5.8646	2.5846	0.799448	3.23298	0.00122506	0.00256581	UP
MAST4-AS1	60.3235	1.0871	0.336278	3.23273	0.00122615	0.00256581	UP
LINC00412	3.97281	1.65047	0.511565	3.22632	0.00125394	0.00261677	UP
CCDC39	13.9758	-10.6997	3.33969	-3.2038	0.00135627	0.00282514	DOWN
LINC00112	2.63225	2.77001	0.86636	3.19729	0.00138724	0.00288702	UP
AC104088.1	5.13968	2.27329	0.711942	3.19308	0.00140764	0.00292416	UP
AC018450.1	5.37587	2.16674	0.678762	3.1922	0.00141195	0.00292904	UP
AL160291.1	1.11095	2.26226	0.708713	3.19207	0.00141256	0.00292904	UP
AC097382.1	1.08494	2.21743	0.695407	3.18867	0.00142927	0.00295832	UP
AC090774.2	9.39897	3.98925	1.25252	3.18497	0.00144767	0.00299369	UP
AL133493.2	2.01202	-3.47859	1.09636	-3.17285	0.00150951	0.00311592	DOWN
LINC01376	58.1969	1.00729	0.318741	3.16021	0.00157655	0.00325137	UP
AC147651.1	2.77256	3.57847	1.13326	3.15768	0.0015903	0.00327086	UP
AL353147.1	5.42331	1.98794	0.630806	3.15143	0.00162473	0.00333867	UP
LINC00887	74.0642	1.40893	0.447387	3.14924	0.00163693	0.00336071	UP
AC002511.2	7.58107	2.8094	0.892394	3.14816	0.00164299	0.00337013	UP
LINC00881	3.86136	-1.26846	0.403659	-3.14241	0.00167563	0.00343092	DOWN
ZNF30-AS1	1.55545	-1.87685	0.597737	-3.13992	0.00168992	0.00345706	DOWN
AC005828.1	0.987745	2.33054	0.742332	3.13948	0.00169249	0.00345922	UP
LINC01429	2.40902	2.88642	0.922733	3.12813	0.00175925	0.00358925	UP
AC022395.1	1.16685	2.32404	0.745054	3.1193	0.00181282	0.00369524	UP
MLIP-IT1	18.2564	1.80069	0.577747	3.11674	0.00182863	0.00372415	UP
LINC00656	1.52948	2.71415	0.871051	3.11595	0.00183351	0.00373076	UP
EGOT	28.3364	1.57584	0.506962	3.10841	0.00188099	0.00381602	UP
AC126365.1	1.07973	2.46365	0.792873	3.10724	0.00188842	0.00382544	UP
TRPM2-AS	70.6505	2.01103	0.648133	3.1028	0.00191699	0.00387643	UP
FAM66B	27.5602	-1.29395	0.41797	-3.0958	0.0019628	0.00396554	DOWN
AC017076.1	7.18863	1.69068	0.546284	3.09488	0.00196894	0.00397444	UP
SMARCA5-AS1	9.45535	1.34483	0.434587	3.0945	0.00197143	0.00397595	UP
FLJ42969	11.1322	1.82238	0.590332	3.08704	0.00202164	0.00407361	UP
LINC01394	1.61536	2.79428	0.906982	3.08085	0.0020641	0.0041555	UP
CYYR1-AS1	2.12221	-2.18514	0.710443	-3.07574	0.00209981	0.00421994	DOWN
AC104938.1	6.29313	1.27855	0.416383	3.0706	0.00213627	0.00428651	UP
AC106786.1	32.0146	1.6336	0.532024	3.07055	0.00213668	0.00428651	UP
LINC01411	5.11108	3.23268	1.05338	3.06885	0.00214883	0.0043071	UP
HHIP-AS1	23.9234	-1.74705	0.570026	-3.06486	0.00217772	0.00435735	DOWN
BRWD1-AS1	1.92883	2.31914	0.758734	3.05659	0.00223868	0.00446758	UP
LINC01322	35.156	3.38483	1.11127	3.04592	0.0023197	0.00462523	UP
SH3RF3-AS1	19.3011	-1.32696	0.437374	-3.03393	0.00241392	0.00480888	DOWN
LINC01363	1.62414	3.04339	1.00481	3.02883	0.00245503	0.00488651	UP
AC006272.1	2.82107	-1.233	0.407364	-3.02678	0.00247175	0.00491551	DOWN
LINC01234	14.0023	2.57224	0.851538	3.02069	0.00252196	0.00501099	UP
TRIM31-AS1	7.90071	1.76231	0.585949	3.00762	0.00263302	0.00521805	UP
AATBC	351.455	1.14756	0.381985	3.00419	0.00266291	0.00527271	UP
AC138123.1	1.13337	2.51004	0.835866	3.00292	0.00267398	0.00529004	UP
C8orf37-AS1	6.7483	1.34631	0.448758	3.00008	0.00269912	0.0053327	UP
CACNA2D3-AS1	1.98926	-2.68329	0.894446	-2.99995	0.00270022	0.0053327	DOWN
AC010240.3	1.58807	2.03937	0.679876	2.99962	0.00270316	0.00533389	UP
OVOL1-AS1	17.8262	1.44604	0.482264	2.99844	0.00271368	0.00535003	UP
ITFG1-AS1	3.58903	1.39805	0.466409	2.99747	0.00272233	0.00535782	UP
AC005523.2	26.4473	-11.6439	3.8866	-2.99591	0.00273627	0.00538062	DOWN
ST3GAL5-AS1	2.49979	-1.53837	0.51378	-2.99422	0.0027515	0.00540592	DOWN
LINC00628	5.27553	1.86276	0.623456	2.9878	0.00280996	0.00551603	UP
TARID	27.3352	-2.59835	0.870296	-2.98559	0.00283034	0.00555126	DOWN
AL161935.1	3.61441	1.79604	0.601678	2.98505	0.0028353	0.00555621	UP
AP001453.1	2.75318	1.64677	0.553569	2.97482	0.00293163	0.00574006	UP
LINC00994	1.09248	-2.83377	0.953565	-2.97176	0.002961	0.0057926	DOWN
P3H2-AS1	19.6537	2.13391	0.718366	2.97051	0.0029731	0.0058113	UP
ANKRD44-IT1	1.28388	2.21673	0.747342	2.96615	0.00301556	0.00588925	UP
LINC00565	23.4944	-1.5166	0.512831	-2.95731	0.00310332	0.00605027	DOWN
LINC01213	9.38065	2.09093	0.707513	2.95532	0.00312346	0.00608435	UP
AL359771.1	8.10342	3.95976	1.34011	2.95481	0.0031286	0.00608917	UP
NFIA-AS2	3.02464	-1.46371	0.495484	-2.9541	0.00313585	0.00609809	DOWN
OPA1-AS1	2.47293	1.97591	0.670523	2.94682	0.0032106	0.00623812	UP
TAT-AS1	1.27391	-1.78358	0.605727	-2.94453	0.00323449	0.00627921	DOWN
LINC01545	4.74763	1.30829	0.444362	2.9442	0.00323795	0.00628059	UP
LMF1-AS1	3.5477	-1.87829	0.638522	-2.94162	0.00326505	0.00632777	DOWN
AL158151.2	1.07161	2.20373	0.751946	2.93071	0.00338192	0.00654316	UP
AL391421.1	1.42551	2.61505	0.893563	2.92654	0.00342755	0.00662583	UP
LINC00391	3.10763	3.01539	1.03237	2.92085	0.00349082	0.00674241	UP
PARD3-AS1	15.5784	1.18985	0.408061	2.91585	0.00354719	0.00684551	UP
LINC01526	1.05355	2.42145	0.834143	2.90292	0.00369696	0.0071225	UP
AC019129.2	0.996115	2.34571	0.808536	2.90118	0.00371758	0.00715618	UP
LINC00200	6.64777	2.37727	0.819648	2.90035	0.00372745	0.00716914	UP
AC141930.2	4.24644	3.46751	1.19709	2.89662	0.00377211	0.00724892	UP
AC128709.3	4.90183	2.94723	1.01808	2.8949	0.00379277	0.00727795	UP
AC099506.1	1.86182	2.99695	1.03532	2.89472	0.00379496	0.00727795	UP
WWC2-AS2	21.2423	-1.00282	0.346447	-2.89457	0.00379678	0.00727795	DOWN
ELDR	3.60814	1.99177	0.690231	2.88565	0.00390605	0.00747486	UP
SAMSN1-AS1	1.71819	2.39713	0.830948	2.88481	0.00391649	0.00748857	UP
L3MBTL4-AS1	10.7749	1.31254	0.455849	2.87934	0.00398508	0.00760697	UP
LINC00499	1.21869	2.37641	0.825538	2.87862	0.0039942	0.00761801	UP
AL359853.1	2.11571	3.43015	1.19172	2.87832	0.00399805	0.00761898	UP
DSCR9	4.93929	-1.15127	0.40015	-2.87709	0.00401362	0.00764228	DOWN
LINC00618	7.67626	1.21347	0.422131	2.87463	0.00404501	0.00769563	UP
AC138035.2	10.3787	-10.2823	3.58363	-2.86924	0.00411464	0.00782158	DOWN
MED4-AS1	1.48852	-1.31872	0.462205	-2.85311	0.00432933	0.00820918	DOWN
AC079584.2	1.23234	2.4045	0.843462	2.85075	0.00436163	0.00826357	UP
AC007106.1	1.47126	2.90433	1.02295	2.83918	0.00452296	0.00856213	UP
FOXP4-AS1	14.9892	1.3579	0.478362	2.83865	0.00453046	0.00856748	UP
AC073578.1	1.68622	2.85553	1.00715	2.83524	0.00457908	0.00864685	UP
AL450992.2	4.2382	-1.60594	0.566841	-2.83313	0.00460943	0.00869697	DOWN
LINC01117	28.7965	1.27122	0.449334	2.82913	0.00466748	0.00879922	UP
AC008737.1	2.56602	1.87519	0.663075	2.82801	0.00468377	0.00882265	UP
LINC00943	21.0322	1.6553	0.586589	2.82191	0.00477391	0.00898502	UP
NBAT1	4.58933	-1.3204	0.468128	-2.82061	0.00479329	0.00901406	DOWN
AC092574.1	5.68109	1.28749	0.456577	2.81987	0.00480427	0.00902729	UP
WDR11-AS1	3.98318	-1.27514	0.453325	-2.81286	0.00491024	0.00921882	DOWN
AC090578.1	4.47916	2.71202	0.964971	2.81047	0.00494688	0.00927236	UP
HCP5B	7.11255	-1.4368	0.511823	-2.80722	0.00499707	0.00935875	DOWN
GACAT2	2.58995	-1.84411	0.657182	-2.80608	0.00501479	0.00938424	DOWN
AL139147.1	3.42001	2.70326	0.963826	2.80472	0.00503606	0.00941631	UP
AL353751.1	2.48392	2.45077	0.874949	2.80104	0.00509382	0.00951652	UP
AC009228.1	8.30173	1.48947	0.531976	2.79988	0.00511218	0.00954302	UP
SATB1-AS1	43.7441	1.30614	0.470369	2.77685	0.00548884	0.0102378	UP
AC007365.1	5.12195	1.59574	0.575005	2.77517	0.00551733	0.0102825	UP
LINC00159	1.02875	2.15151	0.77589	2.77295	0.00555501	0.0103437	UP
LINC01031	2.5532	1.69723	0.612226	2.77223	0.00556729	0.0103503	UP
AC079354.1	1.1844	2.3394	0.845268	2.76764	0.00564641	0.0104888	UP
SRGAP3-AS2	1.71177	-2.56394	0.926755	-2.76658	0.00566484	0.0105145	DOWN
LRP1-AS	1.76865	-1.49185	0.541472	-2.75518	0.005866	0.010879	DOWN
AC226118.1	13.6849	1.53082	0.556335	2.75162	0.00593015	0.0109891	UP
SOX9-AS1	24.0697	1.14385	0.416606	2.74564	0.00603934	0.0111823	UP
LINC00163	3.79451	-2.16758	0.790042	-2.74363	0.00607644	0.0112419	DOWN
AL360178.1	4.50613	1.46124	0.532847	2.74233	0.00610048	0.0112772	UP
LINC-ROR	1.23434	2.64729	0.96593	2.74067	0.00613145	0.0113088	UP
LINC00543	20.3236	2.03344	0.742038	2.74035	0.00613739	0.0113088	UP
AC010999.1	2.2323	1.66371	0.607888	2.73687	0.00620273	0.01142	UP
HTT-AS	1.20654	2.12347	0.777472	2.73125	0.00630942	0.0116071	UP
C4A-AS1	2.20528	-7.99067	2.9357	-2.72189	0.0064909	0.0119313	DOWN
XXYLT1-AS1	2.26594	2.31233	0.850268	2.71953	0.00653745	0.0120072	UP
GDNF-AS1	19.8261	-2.24401	0.825479	-2.71844	0.00655909	0.0120373	DOWN
LINC00639	10.335	-1.1578	0.425953	-2.71813	0.00656524	0.0120389	DOWN
GAS8-AS1	7.72825	1.12627	0.414753	2.71551	0.0066174	0.0121248	UP
LINC01058	2.88299	-1.18015	0.435404	-2.71046	0.00671891	0.0123009	DOWN
LINC01393	13.1775	1.22951	0.45447	2.70536	0.00682304	0.0124616	UP
AC012363.2	1.16397	2.56218	0.950759	2.69488	0.00704148	0.0128503	UP
AC119674.1	2.99262	1.51785	0.565897	2.68221	0.00731382	0.0133153	UP
LINC00677	2.85238	1.64976	0.61656	2.67576	0.00745608	0.0135527	UP
AC063944.1	3.12327	1.57994	0.591102	2.67288	0.00752034	0.0136587	UP
LINC01563	4.817	-1.82688	0.683761	-2.67182	0.0075442	0.0136911	DOWN
AP001626.1	3.62052	-1.79464	0.671918	-2.67092	0.00756428	0.0137166	DOWN
LHX5-AS1	1.46857	2.89803	1.0853	2.67025	0.0075795	0.0137333	UP
AL356310.1	1.29822	2.72175	1.01948	2.66974	0.00759097	0.0137432	UP
AC138035.1	6.27089	1.23776	0.463777	2.66887	0.00761059	0.0137678	UP
THRB-AS1	5.19581	-1.11286	0.417222	-2.66731	0.00764604	0.013803	DOWN
AC010967.1	1.82144	2.72475	1.02154	2.66729	0.00764663	0.013803	UP
AL136115.1	1.87488	1.81612	0.683395	2.6575	0.00787216	0.0141736	UP
LINC00158	6.29955	1.6405	0.617378	2.6572	0.0078792	0.0141751	UP
AC116345.1	5.50528	2.57376	0.969405	2.65499	0.00793105	0.0142572	UP
LY86-AS1	5.54513	1.52438	0.574669	2.65263	0.00798673	0.0143459	UP
AL353803.1	1.39071	2.335	0.880769	2.65109	0.00802322	0.0143888	UP
IGF2BP2-AS1	4.91739	1.66791	0.629403	2.64999	0.00804953	0.0144222	UP
SPATA8	1.13544	-2.84006	1.07181	-2.64978	0.00805447	0.0144222	DOWN
PLS3-AS1	35.233	1.02421	0.38735	2.64416	0.00818951	0.0146411	UP
AL158175.1	1.73944	2.90032	1.09824	2.64086	0.00826947	0.0147725	UP
AC005740.4	6.57573	1.02509	0.388697	2.63723	0.00835851	0.0149082	UP
AC007391.2	1.08202	-1.56547	0.594199	-2.63459	0.00842388	0.0150023	DOWN
AC003092.1	1.40818	2.83811	1.07726	2.63457	0.00842442	0.0150023	UP
AC005253.2	9.61348	-10.1839	3.87277	-2.62963	0.00854773	0.01521	DOWN
SERTAD4-AS1	121.002	-1.00488	0.38232	-2.62837	0.00857955	0.0152429	DOWN
EZR-AS1	1.63923	1.83432	0.698138	2.62745	0.00860281	0.01527	UP
LINC00928	6.1902	1.76821	0.674054	2.62324	0.00870973	0.015434	UP
AC128709.2	7.38641	2.2789	0.868873	2.62282	0.00872056	0.015434	UP
HCFC1-AS1	1.67974	1.87393	0.714476	2.6228	0.00872094	0.015434	UP
TGFB2-OT1	9.48161	-10.164	3.87846	-2.62063	0.00877675	0.0155208	DOWN
AC092484.1	2.84306	3.12681	1.19334	2.62022	0.00878718	0.0155272	UP
LINC00334	3.56957	-1.07353	0.410478	-2.61532	0.00891452	0.01574	DOWN
MGC32805	66.4508	2.00314	0.768106	2.6079	0.00910997	0.0160479	UP
XXYLT1-AS2	14.533	1.35438	0.519512	2.60703	0.00913317	0.0160764	UP
BX255923.2	2.05491	-1.32146	0.507253	-2.60513	0.00918394	0.0161533	DOWN
AP000350.6	32.5346	1.6319	0.626642	2.60419	0.00920918	0.0161852	UP
AC027288.1	1.41044	2.11247	0.812079	2.60131	0.00928674	0.0163089	UP
LINC00896	21.8517	1.13593	0.436726	2.60101	0.00929493	0.0163108	UP
LINC01093	1.85163	2.26294	0.87059	2.59932	0.00934089	0.0163788	UP
MIF-AS1	36.2973	-1.13915	0.439021	-2.59476	0.00946579	0.0165851	DOWN
EVX1-AS	2.33989	-3.22869	1.24565	-2.59196	0.00954299	0.0167075	DOWN
AC087392.1	13.344	1.30861	0.50556	2.58844	0.00964107	0.0168534	UP
TH2LCRR	4.21746	1.01985	0.39407	2.58798	0.00965398	0.0168631	UP
AC002480.2	4.19975	1.927	0.7455	2.58485	0.00974226	0.0170043	UP
AL139383.1	13.9663	1.48805	0.576334	2.58192	0.00982515	0.0171358	UP
LINC01433	5.63328	1.65147	0.640354	2.579	0.00990861	0.0172682	UP
LINC00622	27.7488	-1.08172	0.419594	-2.57801	0.00993719	0.0173048	DOWN
WDR86-AS1	40.4222	-1.39005	0.540178	-2.57331	0.0100731	0.0175281	DOWN
AP000944.1	1.55313	1.76599	0.688577	2.56469	0.0103268	0.0179558	UP
DLGAP1-AS5	22.2407	3.36733	1.31343	2.56376	0.0103544	0.0179903	UP
AC005224.2	10.3912	-1.26504	0.493758	-2.56206	0.0104053	0.0180649	DOWN
AC013460.1	6.06801	-1.07756	0.42074	-2.56111	0.0104339	0.018087	DOWN
LINC00319	9.07273	-1.43372	0.560254	-2.55906	0.0104955	0.0181799	DOWN
PAUPAR	1.31332	2.74104	1.07175	2.55754	0.0105416	0.0182459	UP
ZNRF3-AS1	1.91343	-1.30541	0.510534	-2.55695	0.0105595	0.0182632	DOWN
AC005722.4	3.87377	2.60361	1.01875	2.55568	0.0105979	0.0183157	UP
AP000696.2	1.64248	-1.56275	0.613113	-2.54887	0.0108072	0.0186491	DOWN
ELOVL2-AS1	1.80607	2.95671	1.16445	2.53916	0.011112	0.0191317	UP
AGBL1-AS1	5.49106	2.11943	0.837957	2.52928	0.0114295	0.0196488	UP
LINC01419	1.43542	2.86856	1.13475	2.52793	0.0114739	0.0197102	UP
AC092580.4	15.165	1.44756	0.573973	2.522	0.011669	0.0200303	UP
LINC01527	5.73392	2.21913	0.883816	2.51085	0.012044	0.0206382	UP
AC009264.1	15.6516	3.29505	1.31255	2.51042	0.0120587	0.0206382	UP
LINC01522	8.79364	1.65358	0.65869	2.5104	0.0120593	0.0206382	UP
TMEM26-AS1	1.06275	-1.58817	0.633818	-2.50572	0.0122202	0.0208979	DOWN
LINC00992	25.5415	2.39101	0.955009	2.50365	0.0122921	0.0210051	UP
AC007952.5	2.03855	-7.85971	3.14221	-2.50133	0.0123727	0.0211189	DOWN
LINC01208	4.15106	1.7449	0.697696	2.50094	0.0123864	0.0211189	UP
TSPEAR-AS1	17.1488	-1.85625	0.744008	-2.49494	0.012598	0.0214635	DOWN
AC103563.9	4.41597	1.19853	0.481293	2.49022	0.0127664	0.0217344	UP
LINC00940	1.05748	-3.13064	1.25986	-2.48491	0.0129584	0.0220283	DOWN
SYNPR-AS1	7.68223	2.5742	1.03664	2.48322	0.0130201	0.0221093	UP
LINC00398	2.06648	-1.19237	0.480201	-2.48307	0.0130254	0.0221093	DOWN
LNX1-AS2	3.3244	1.37639	0.555852	2.47618	0.0132797	0.0224621	UP
PYCARD-AS1	0.97086	-1.40403	0.567031	-2.4761	0.0132825	0.0224621	DOWN
AL022326.1	1.07683	2.20904	0.892285	2.47572	0.0132969	0.0224699	UP
ZNF528-AS1	122.918	-1.1856	0.479019	-2.47505	0.0133217	0.0224951	DOWN
FP671120.4	1.34156	2.77831	1.12404	2.47171	0.0134467	0.0226807	UP
AC078993.1	1.57776	2.51606	1.01892	2.46935	0.013536	0.0228064	UP
STEAP3-AS1	43.8325	1.13495	0.459795	2.46838	0.0135728	0.0228515	UP
AC022872.1	1.15664	2.06192	0.838567	2.45886	0.0139379	0.0234145	UP
SALRNA1	14.638	1.38572	0.564883	2.4531	0.0141629	0.023775	UP
AC004543.1	1.13581	1.7944	0.731671	2.45247	0.014188	0.0237878	UP
LINC01582	4.53462	4.53	1.84718	2.45238	0.0141914	0.0237878	UP
C12orf77	1.23094	2.65066	1.08115	2.45169	0.0142186	0.0238158	UP
VLDLR-AS1	53.4093	1.07771	0.439821	2.45035	0.0142719	0.0238877	UP
LINC01361	5.07689	1.90699	0.780502	2.44328	0.0145543	0.0243425	UP
IL20RB-AS1	22.095	1.41738	0.582862	2.43175	0.0150259	0.0250944	UP
EPN2-AS1	2.64948	-1.03285	0.424891	-2.43087	0.0150627	0.0251375	DOWN
AC025279.1	2.31968	1.4003	0.576878	2.42737	0.0152087	0.0253386	UP
TSPEAR-AS2	19.4848	-1.59412	0.656777	-2.42719	0.0152165	0.0253386	DOWN
AC239868.1	3.12535	1.22408	0.505735	2.4204	0.0155034	0.0257788	UP
SND1-IT1	2.63025	-1.35648	0.560989	-2.41801	0.0156054	0.0259296	DOWN
LINC01224	31.3674	2.72662	1.12781	2.41762	0.0156222	0.0259385	UP
AC108519.1	32.023	1.3221	0.54859	2.41	0.0159524	0.0264099	UP
AC004490.1	4.33555	-1.61581	0.670986	-2.40811	0.0160352	0.0265279	DOWN
LINC01476	1.24195	1.67855	0.699804	2.39861	0.0164576	0.0271479	UP
C7orf65	2.27853	2.31986	0.968396	2.39557	0.0165946	0.0273542	UP
AL355490.1	2.35057	1.41759	0.592624	2.39205	0.0167546	0.027598	UP
AC078882.1	1.33438	2.76315	1.15638	2.38949	0.0168719	0.0277712	UP
USP12-AS2	1.73894	1.92637	0.806402	2.38884	0.0169016	0.0277999	UP
SH3PXD2A-AS1	307.107	1.22139	0.511964	2.38569	0.0170469	0.0280188	UP
AC016735.1	2.96756	2.49436	1.04636	2.38385	0.0171325	0.0281393	UP
LINC01271	4.10043	-1.16349	0.490807	-2.37057	0.0177606	0.0291498	DOWN
AC005355.1	1.90216	2.54232	1.07282	2.36976	0.0177996	0.0291928	UP
C20orf197	53.5139	1.45914	0.619047	2.35707	0.0184198	0.0301244	UP
AL109947.1	1.07459	1.7141	0.727259	2.35693	0.0184267	0.0301244	UP
PLCXD2-AS1	1.12318	1.76825	0.754275	2.3443	0.0190629	0.0311307	UP
AL589743.1	4.47417	-9.08054	3.87842	-2.3413	0.0192167	0.0313593	DOWN
LINC00165	12.9485	2.62659	1.12311	2.33868	0.0193521	0.0315577	UP
ST3GAL6-AS1	36.1487	1.01202	0.434097	2.33133	0.0197359	0.0321149	UP
AC004012.1	2.87103	2.16932	0.930817	2.33055	0.0197771	0.0321589	UP
FLG-AS1	74.4623	-1.19852	0.514867	-2.32782	0.0199217	0.032363	DOWN
AC073316.1	5.53444	-1.57089	0.674882	-2.32764	0.019931	0.032363	DOWN
AC005034.2	1.36231	1.57335	0.676339	2.32627	0.020004	0.0324309	UP
FRY-AS1	1.63051	-1.28765	0.553576	-2.32606	0.0200154	0.0324309	DOWN
ABCC5-AS1	1.278	1.72302	0.744798	2.31341	0.0207002	0.0334929	UP
DBET	3.00804	2.32908	1.00808	2.31041	0.0208656	0.0336889	UP
AC008464.1	2.06642	3.39623	1.47114	2.30857	0.0209673	0.0338292	UP
PAPPA-AS1	3.99557	-8.91733	3.86855	-2.30508	0.0211619	0.034119	DOWN
ROR1-AS1	3.53023	-1.28895	0.559738	-2.30277	0.021292	0.0343047	DOWN
FOXP1-IT1	1.41407	-1.10854	0.481534	-2.30211	0.0213292	0.0343403	DOWN
LINC00857	221.057	1.06498	0.462727	2.30154	0.0213612	0.0343621	UP
LINC01169	1.93309	2.07393	0.901186	2.30133	0.0213728	0.0343621	UP
AC013549.1	1.32855	1.77626	0.771993	2.30088	0.0213983	0.0343788	UP
WARS2-IT1	6.32735	-1.23866	0.538847	-2.29871	0.0215212	0.0345519	DOWN
AC078864.1	4.23833	3.01918	1.31859	2.2897	0.0220386	0.0353329	UP
LINC00556	1.71255	2.14699	0.940985	2.28164	0.0225106	0.0360643	UP
AC010168.1	22.0773	1.33062	0.584372	2.27701	0.0227857	0.0364794	UP
SIX3-AS1	3.04386	3.95392	1.74974	2.25972	0.0238387	0.0381386	UP
ARHGAP26-AS1	3.95776	1.84315	0.817076	2.25579	0.0240836	0.0385035	UP
LINC01597	42.1076	1.59173	0.706201	2.25393	0.0242008	0.0386586	UP
ADAMTS19-AS1	3.97631	-3.24116	1.43814	-2.25371	0.0242145	0.0386586	DOWN
SLC26A4-AS1	19.6421	-1.50408	0.668849	-2.24875	0.0245283	0.0391184	DOWN
PCAT14	8.97593	-2.79259	1.24562	-2.24193	0.0249661	0.0397196	DOWN
AL138963.1	1.15103	1.56849	0.702116	2.23395	0.0254862	0.0404906	UP
INE2	3.27518	-8.6305	3.8664	-2.23218	0.0256031	0.040648	DOWN
TXNDC12-AS1	1.221	1.65813	0.743158	2.2312	0.0256678	0.0407225	UP
LINC01179	1.37684	2.80619	1.26184	2.22389	0.026156	0.0414682	UP
MIR4500HG	6.5356	2.15152	0.96771	2.22331	0.0261949	0.041501	UP
AC092718.1	1.40111	1.60278	0.721271	2.22217	0.026272	0.0415943	UP
HOTAIR	65.2952	1.25904	0.566931	2.2208	0.0263642	0.0417114	UP
AL162419.1	1.04938	2.4218	1.09134	2.21911	0.0264793	0.0418644	UP
AC008780.1	0.861824	2.13047	0.961726	2.21526	0.0267422	0.0422508	UP
AC097639.1	32.1144	1.19467	0.539897	2.21278	0.0269129	0.0424911	UP
AC009312.1	4.66123	1.79285	0.814647	2.20078	0.0277519	0.0437552	UP
LINC01181	5.15744	2.38152	1.08294	2.19912	0.0278693	0.04391	UP
TRBV11-2	10.7171	1.35351	0.615861	2.19775	0.0279669	0.0440335	UP
AL137024.1	1.34027	2.52607	1.15088	2.1949	0.0281709	0.044324	UP
FAM167A-AS1	1.03631	-2.19344	1.00138	-2.19042	0.0284941	0.0447707	DOWN
FOCAD-AS1	2.5754	1.24262	0.567369	2.19015	0.0285136	0.0447707	UP
PROSER2-AS1	54.2577	1.23947	0.567188	2.1853	0.0288669	0.0452632	UP
AL161652.1	0.755841	1.94477	0.891742	2.18087	0.0291931	0.0457189	UP
LINC00479	19.7355	1.11531	0.512835	2.17479	0.0296456	0.0463886	UP
OSTN-AS1	2.27321	1.91155	0.880086	2.17201	0.0298552	0.0466607	UP
CTD-2194D22.4	2.02747	2.39466	1.10255	2.17194	0.0298604	0.0466607	UP
LINC01602	1.43384	2.8656	1.32176	2.16803	0.0301568	0.0470916	UP
AC010931.1	7.12394	1.44928	0.669007	2.16632	0.0302869	0.0472625	UP
LINC00973	2.49083	2.448	1.13067	2.16509	0.0303805	0.0473761	UP
LINC00689	28.8067	-1.61585	0.748623	-2.15843	0.0308946	0.0481121	DOWN
KIF25-AS1	2.38052	-1.8874	0.878602	-2.14819	0.0316987	0.0491965	DOWN
DLG3-AS1	4.40756	1.3444	0.626971	2.14428	0.0320102	0.0496126	UP
AC003958.2	7.1265	1.60561	0.749007	2.14365	0.0320611	0.0496577	UP
LINC00671	3.96216	-1.84276	0.859998	-2.14274	0.0321336	0.0497363	DOWN
LINC00911	1.66677	3.08312	1.44469	2.1341	0.0328343	0.0507519	UP
LINC01511	2.63009	1.41891	0.665186	2.1331	0.0329162	0.0508442	UP
ZBTB20-AS4	1.52223	-1.25583	0.589386	-2.13074	0.0331103	0.0510753	DOWN
LINC00161	1.61355	-1.66411	0.780999	-2.13074	0.0331106	0.0510753	DOWN
LINC00615	1.1198	2.5071	1.17828	2.12777	0.0333562	0.0513847	UP
AC093159.1	6.09538	1.47376	0.692953	2.12678	0.0334383	0.0514765	UP
NAALADL2-AS2	3.67611	1.91527	0.901172	2.12531	0.033561	0.0516306	UP
AC092384.1	1.53022	1.73752	0.81776	2.12473	0.0336092	0.0516698	UP
AC055736.1	3.26451	2.3712	1.11838	2.12021	0.033988	0.052217	UP
GK-IT1	1.88241	1.57545	0.743587	2.11872	0.0341139	0.0523753	UP
AC062028.1	3.41824	1.30367	0.616566	2.1144	0.0344811	0.0529035	UP
KCNQ1DN	1.03341	2.1482	1.01832	2.10956	0.0348963	0.0534687	UP
SRGAP3-AS4	1.80531	1.72451	0.819174	2.10518	0.0352758	0.0540139	UP
GFOD1-AS1	1.15831	1.57961	0.753759	2.09564	0.0361139	0.0551862	UP
LINC01096	14.5874	1.32087	0.63052	2.0949	0.0361802	0.0552505	UP
MEIS1-AS3	4.89546	-1.21859	0.582141	-2.09329	0.0363232	0.0553947	DOWN
LINC00923	47.077	1.60198	0.768922	2.08341	0.0372142	0.0566023	UP
AC064836.1	1.80645	1.5615	0.750562	2.08044	0.0374851	0.0569763	UP
LINC01500	2.64198	1.95054	0.938328	2.07874	0.0376414	0.0571758	UP
C4B-AS1	2.18832	-8.04877	3.87432	-2.07747	0.0377585	0.0572775	DOWN
AL117334.1	1.95345	1.29644	0.624258	2.07677	0.0378226	0.0573366	UP
IFT74-AS1	1.48104	1.44137	0.695584	2.07217	0.0382494	0.0579452	UP
LINC00544	1.98501	1.86227	0.900565	2.06789	0.0386508	0.0585145	UP
AC093523.1	3.20868	1.65478	0.801204	2.06536	0.0388885	0.0588353	UP
RAPGEF4-AS1	1.7357	-1.25479	0.607814	-2.06444	0.0389763	0.058929	DOWN
EPHA5-AS1	1.19413	-3.43484	1.66663	-2.06095	0.0393079	0.0593911	DOWN
AC124861.1	1.80585	1.97571	0.958986	2.0602	0.0393791	0.0594593	UP
LINC01416	3.87111	1.82221	0.885126	2.0587	0.0395226	0.0596366	UP
LINC00668	23.4141	2.26672	1.10766	2.04641	0.0407164	0.0613567	UP
B3GALT5-AS1	82.9967	1.60138	0.783752	2.04323	0.0410298	0.061752	UP
DIP2A-IT1	1.48553	1.45036	0.710387	2.04165	0.041186	0.0619417	UP
FP236383.3	1.13014	2.52087	1.23557	2.04025	0.0413254	0.0620697	UP
LL22NC03-63E9.3	1.1216	2.51133	1.2331	2.0366	0.0416902	0.0624942	UP
AC114798.1	1.71584	1.6898	0.831112	2.03318	0.0420342	0.0628037	UP
AC073316.2	1.02808	-1.6554	0.814886	-2.03145	0.0422099	0.0630249	DOWN
GS1-594A7.3	2.21516	1.84475	0.909964	2.02728	0.0426341	0.0636168	UP
TDRG1	7.98753	2.07081	1.023	2.02426	0.0429436	0.0639949	UP
AC097499.2	1.36759	2.80091	1.38417	2.02354	0.0430177	0.0640635	UP
LINC01397	3.06769	1.18429	0.588554	2.01221	0.0441981	0.0657368	UP
AL135784.1	2.19888	3.48467	1.73177	2.0122	0.0441988	0.0657368	UP
KCNK15-AS1	8.22216	-1.08396	0.541937	-2.00015	0.0454838	0.0675598	DOWN
MTUS2-AS1	3.0374	-1.07565	0.538432	-1.99775	0.0457443	0.0679026	DOWN
AC005042.1	1.10435	2.49027	1.24934	1.99327	0.046232	0.068493	UP
LINC00868	1.01395	-1.36498	0.688051	-1.98384	0.0472737	0.0699455	DOWN
NAV2-AS1	1.6623	-7.65214	3.85978	-1.98253	0.04742	0.0700711	DOWN
AP000439.2	0.97305	2.0647	1.04246	1.98061	0.0476345	0.0703426	UP
AC093515.1	1.47961	2.91226	1.47293	1.97719	0.0480207	0.0708564	UP
LINC01191	6.20299	1.06299	0.539085	1.97184	0.0486276	0.0715776	UP
